# Supplementary material for: High-efficiency ammonia electrosynthesis from nitrate on ruthenium-induced trivalent cobalt sites
Source: Royal Society of Chemistry journal article supplement (doi:10.1039/d5ee01585e), 2025-01-01
Supplement: d5ee01585e1.pdf [file d5ee01585e1.pdf]

## Supplementary Information

### High-efficiency ammonia electrosynthesis from nitrate on ruthenium-induced trivalent cobalt sites

Longcheng Zhang,<sup>a,b</sup> Yuan Liu,<sup>b</sup> Ling Li,<sup>c</sup> Tianze Wu,<sup>b</sup> Qian Wu,<sup>b</sup> Justin Zhu Yeow Seow,<sup>b</sup> Xiu Lin,<sup>b</sup> Shirong Sun,<sup>b</sup> Leonhard Tannesia,<sup>b</sup> Kai Tang,<sup>b</sup> Dongsheng Shao,<sup>b</sup> Shibo Xi,<sup>d</sup> Xiaodong Guo<sup>\*a</sup> and Zhichuan J. Xu<sup>\*b,e</sup>

<sup>a</sup> School of Chemical Engineering, Sichuan University, Chengdu 610065, China

<sup>b</sup> School of Material Science and Engineering, Nanyang Technological University, Singapore 639798, Singapore

<sup>c</sup> Analytical & Testing Centre, Sichuan University, Chengdu 610064, China

<sup>d</sup> Institute of Sustainability for Chemicals, Energy and Environment (ISCE<sup>2</sup>), Agency for Science, Technology and Research (A\*STAR), Singapore 627833, Singapore

<sup>e</sup> Centre for Advanced Catalysis Science and Technology, Nanyang Technological University, Singapore 639798, Singapore

\* Corresponding author email: xuzc@ntu.edu.sg; xiaodong2009@scu.edu.cn

## Experiment Section

**Synthesis of Co(OH)<sub>2</sub>/CC:** First, a well-cut small piece of CC ( $2 \times 3 \text{ cm}^2$ ) was soaked in concentrated nitric acid at 80 °C for 2 h, then sonicated in acetone and deionized water (15 min each), and subsequently dried in an oven at 70 °C for 1 h. Co(OH)<sub>2</sub> nanosheets were electrodeposited on CC using a Metrohm Autolab workstation in a three-electrode setup, where CC, Pt foil, and saturated calomel electrode as the working, counter, and reference electrodes, respectively. Electrodeposition was conducted in a 50 mL solution containing 50 mM Co(NO<sub>3</sub>)<sub>2</sub>·6H<sub>2</sub>O at an applied potential of −1 V for 900 s. Afterward, the electrode was rinsed with deionized water and dried at 70 °C.

**Synthesis of Ru-Co(OH)<sub>2</sub>/CC:** A piece of Co(OH)<sub>2</sub>/CC ( $2 \times 3 \text{ cm}^2$ ) was immersed in 20 mL of 5 mM RuCl<sub>3</sub> solution for 20 min. The resulting material was thoroughly rinsed with deionized water before being dried at 70 °C overnight.

**Materials characterizations:** The crystal structure of the samples was analyzed using XRD on a Bruker D2 Phaser. Sample morphology was examined by SEM using a JEOL JSM-7600F microscope. TEM, HRTEM, and the related elemental mapping were conducted using a JEOL JEM-2100 Plus microscope. The electronic states of materials were examined by XPS using a Shimadzu Kratos Axis Supra instrument. UV-Vis absorbance spectra were acquired with a Shimadzu UV-2700 spectrophotometer. <sup>1</sup>H NMR signals for isotope-labeling experiments were recorded on a Bruker 400 MHz

system. XAS, including XANES and EXAFS, was conducted at the XAFCA beamline at the Singapore Synchrotron Light Source. Data processing was conducted using the ATHENA module in the Demeter software suite.

**Electrochemical measurements:** Prior to testing, the Nafion 117 membrane ( $3 \times 3 \text{ cm}^2$ ,  $183 \text{ }\mu\text{m}$  thick) was protonated via sequential treatments: (i) immersion in 5%  $\text{H}_2\text{O}_2$  at  $80 \text{ }^\circ\text{C}$  for 2 h, (ii) treatment in 0.5 M  $\text{H}_2\text{SO}_4$  at  $80 \text{ }^\circ\text{C}$  for 2 h, and (iii) boiling in deionized water for 1 h. The cathode and anode compartments were each filled with 50 mL of 1 M KOH solution containing 2,000 ppm  $\text{NO}_3^-$  at room temperature unless otherwise specified. Before each measurement, high-purity Ar gas (99.99%) was bubbled into both compartments of the H-cell for at least 30 min. EIS was carried out to determine solution resistance, and all potentials were corrected with 50% iR compensation unless otherwise noted. Chronoamperometry was conducted at constant applied potentials for 30 min, with stirring at 900 revolutions per minute, to monitor current density over time. All potentials were converted to the RHE scale:  $E_{\text{RHE}} = E_{\text{Hg/HgO}} + 0.0591 \times \text{pH} + 0.098 \text{ V}$ .  $\text{NO}_3^-$  removal tests were evaluated in a batch H-cell containing 1 M KOH with 2,000 ppm  $\text{NO}_3^-$  over 70 min, with electrolyte samples collected every 10 min for product quantification.

**Calculation of EE:** EE is calculated with the following equation:

$$EE = (1.23 - E_{\text{NH}_3}) \times FE_{\text{NH}_3} / (1.23 - E)$$

Here,  $E_{\text{NH}_3}$  (0.69 V) is the equilibrium potential for  $\text{NO}_3^-$  electroreduction to  $\text{NH}_3$ ,<sup>1</sup>  $FE_{\text{NH}_3}$  is the FE for  $\text{NH}_3$ , 1.23 V represents the equilibrium potential of water oxidation (assuming zero overpotential), and  $E$  is the potential vs. RHE after 80% iR compensation.<sup>2</sup>

**In situ Raman spectroscopy:** In situ Raman measurements were carried out by confocal Raman spectroscopy (Horiba Jobin Yvon Co., France) equipped with a 633 nm laser. All the Raman measurements were performed with a 50× microscope objective. Raman spectra were recorded systematically at various potentials using a Metrohm Autolab workstation. The quartz electrochemical cell was placed beneath the objective lens.

**$^{15}\text{N}$  isotope-labelling experiment:** To qualitatively confirm the source of  $\text{NH}_3$ , 1 M KOH containing 2,000 ppm  $\text{K}^{15}\text{NO}_3$  (>98 atom%  $^{15}\text{N}$ ) was used as the feeding electrolyte. Specifically, after  $^{15}\text{NO}_3^-$  electroreduction for 30 min, the electrolyte was collected, diluted to the appropriate detection range, and adjusted to pH 2 using 0.1 M HCl. Subsequently, 0.5 mL of this prepared solution was mixed with  $\text{DMSO-d}_6$  (hexadeuterodimethyl sulfoxide) containing 0.04 wt% maleic acid for  $^1\text{H}$  NMR measurements.

**Quasi in situ EPR tests:** EPR measurements were conducted to detect radicals or intermediates generated during electrochemical reactions. Chronoamperometry was performed at a constant potential for 5 min, during which radicals or intermediates

generated were trapped by DMPO. The solution was then immediately extracted for subsequent EPR analysis.

**Computational details:** All calculations in this work were carried out using the Vienna Ab Initio Simulation Package. The valence electron states were represented using a plane-wave basis set with an energy cutoff of 500 eV, while the projector-augmented wave method was applied to account for core electrons. Convergence in the electronic self-consistency loop was ensured with a threshold of  $10^{-5}$  eV. For structural relaxations, all atomic coordinates and lattice parameters were optimized until residual forces were reduced below 0.01 eV/Å. A Gaussian smearing method with a width of 0.05 eV was adopted for integration. For structural optimizations, A  $\Gamma$  centered Monkhorst-Pack k-point grid of  $3 \times 3 \times 1$  was utilized during structural optimizations, which was refined to  $6 \times 6 \times 1$  for DOS calculations. To eliminate interactions between periodic images, a vacuum layer of 15 Å was introduced. While the van der Waals (vdW) forces were excluded due to the robust interfacial bonding, the dispersion-corrected DFT-D3 method was applied to describe vdW interactions where relevant. Bader charge analysis was performed with tools developed by Henkelman et al.<sup>3</sup>

**NO<sub>3</sub><sup>-</sup> Electrolysis in MEA System:** The custom-built MEA setup with a serpentine flow channel included two titanium current collector plates (cathode and anode), two polytetrafluoroethylene gaskets each featuring a 4 cm<sup>2</sup> window, and an Alkymer W-25 anion exchange membrane in between. An IrO<sub>2</sub>/C ink, sprayed onto PTFE, acted as the anode. The cell was compressed by applying 6 N•m of torque to each of the four bolts. A solution of 1 M KOH containing 2,000 ppm NO<sub>3</sub><sup>-</sup> was circulated from the electrolyte

reservoir through the cathode side, while another 1 M KOH solution was circulated on the anode side. A fully sealed circulation system was used to prevent  $\text{NH}_3$  volatilization. To convert the produced  $\text{NH}_3$  into  $\text{NH}_4\text{Cl}$ , the reaction electrolyte was transferred to a sealed bottle connected to another containing an HCl solution (0.3 M, 200 mL). Inert Ar gas (100 sccm) was supplied for 12 h, enabling selective  $\text{NH}_3$  extraction through air stripping and trapping in the HCl solution to form  $\text{NH}_4\text{Cl}$ . Water was removed from the product using a rotary evaporator, yielding  $\text{NH}_4\text{Cl}$  as a white powder. Residual moisture was removed in a box oven, ensuring complete conversion of  $\text{NO}_3^-$  to  $\text{NH}_4\text{Cl}$  powder.

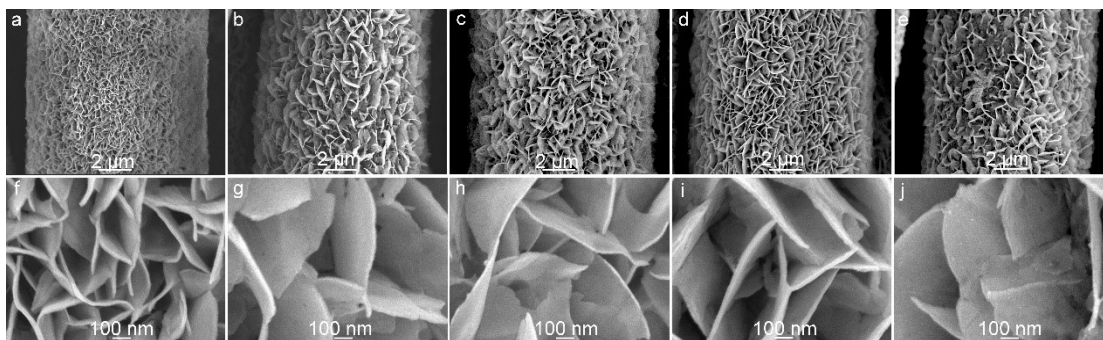

**Fig. S1.** Low- and high-magnification SEM images of (a, f)  $\text{Co(OH)}_2/\text{CC}$ , (b, g)  $\text{Ru-0.2-Co(OH)}_2/\text{CC}$ , (c, h)  $\text{Ru-1-Co(OH)}_2/\text{CC}$ , (d, i)  $\text{Ru-5-Co(OH)}_2/\text{CC}$ , and (e, j)  $\text{Ru-10-Co(OH)}_2/\text{CC}$ .

SEM images in Figs. S1a-j show that the surfaces of nanosheets become progressively rougher with an increase in  $\text{RuCl}_3$  solution concentrations from 0.2 to 5 mM. However, when the concentration of  $\text{RuCl}_3$  solution was further increased to 10 mM, the original vertical nanosheets slightly collapsed and adhered to one another (Fig. S1j)

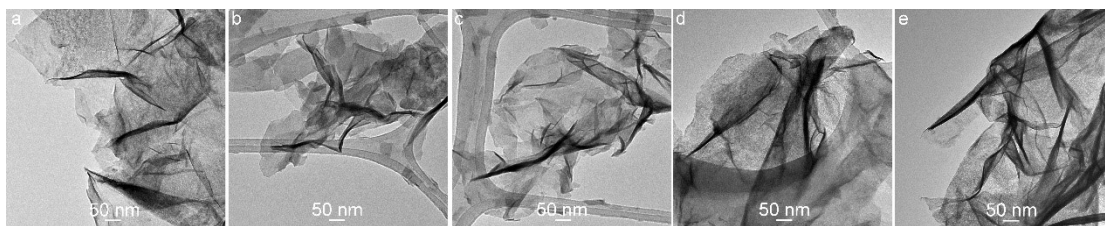

**Fig. S2.** TEM images of (a)  $\text{Co(OH)}_2$ , (b)  $\text{Ru-0.2-Co(OH)}_2$ , (c)  $\text{Ru-1-Co(OH)}_2$ , (d)  $\text{Ru-5-Co(OH)}_2$ , and (e)  $\text{Ru-10-Co(OH)}_2$ .



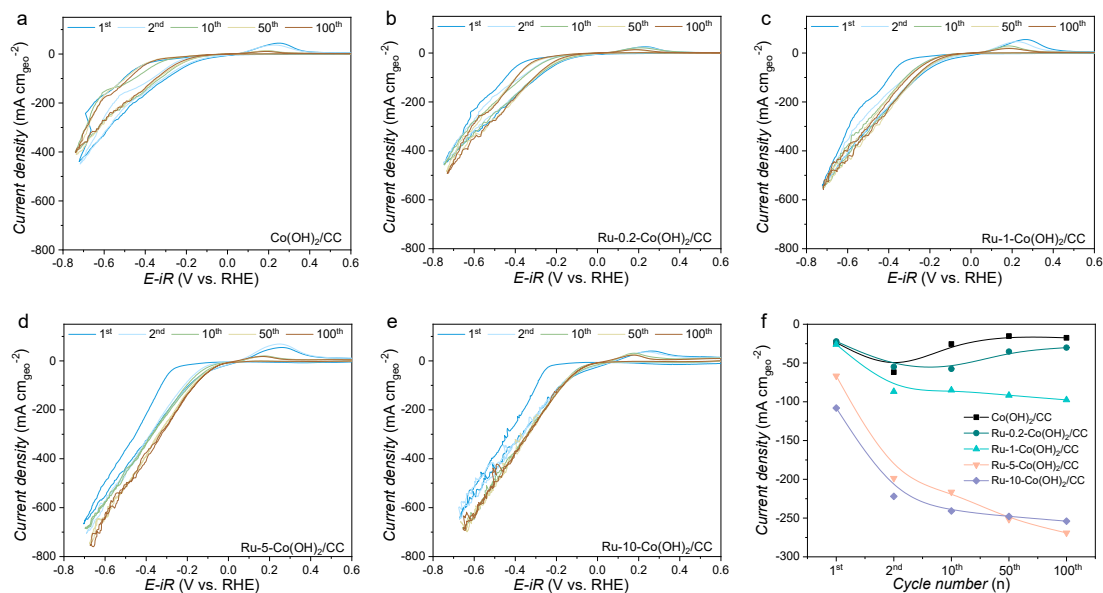

**Fig. S3.** CV curves for (a) Co(OH)<sub>2</sub>/CC, (b) Ru-0.2-Co(OH)<sub>2</sub>/CC, (c) Ru-1-Co(OH)<sub>2</sub>/CC, (d) Ru-5-Co(OH)<sub>2</sub>/CC, and (e) Ru-10-Co(OH)<sub>2</sub>/CC from the 1<sup>st</sup> to the 100<sup>th</sup> cycle in Ar-saturated 1 M KOH solution with 2,000 ppm NO<sub>3</sub><sup>-</sup>. (f) Evolution of the current density at -0.3 V vs. RHE during cycling for Co(OH)<sub>2</sub>/CC and Ru-x-Co(OH)<sub>2</sub>/CC.

As shown in Fig. S3a, the Co(OH)<sub>2</sub>/CC exhibits a decline in current density after the initial cycles, indicating deactivation. This can be attributed to the intrinsic instability of pristine Co(OH)<sub>2</sub> under the applied electrochemical conditions. In contrast, the Ru-doped Co(OH)<sub>2</sub>/CC electrodes show a continuous increase in current density with cycling, which we attribute to the progressive reconstruction of the active surface. The presence of Ru promotes the formation of more active catalytic sites during electrochemical cycling.

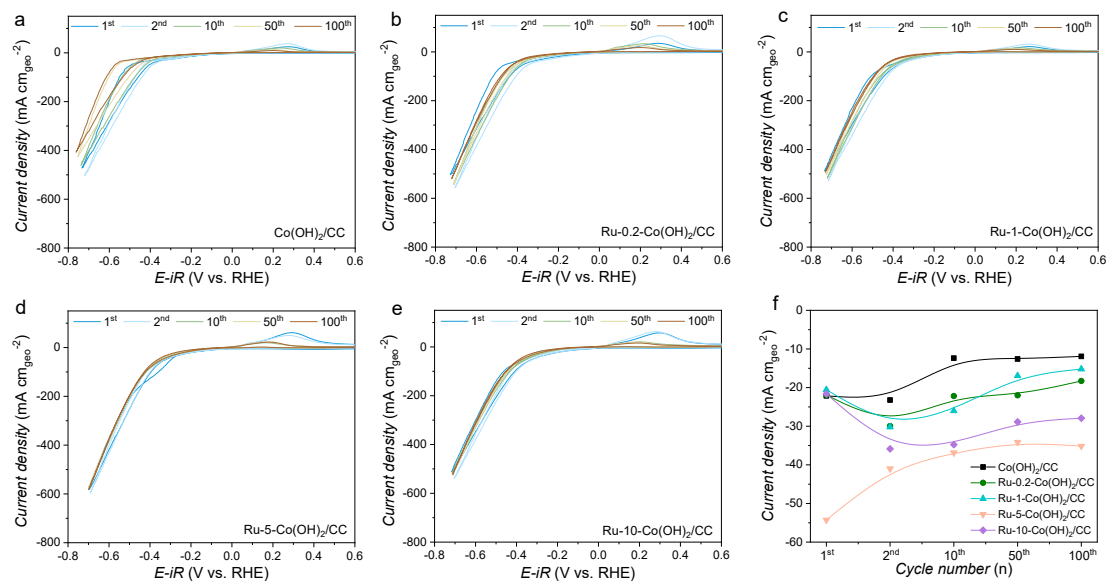

**Fig. S4.** CV curves for (a)  $\text{Co(OH)}_2/\text{CC}$ , (b)  $\text{Ru-0.2-Co(OH)}_2/\text{CC}$ , (c)  $\text{Ru-1-Co(OH)}_2/\text{CC}$ , (d)  $\text{Ru-5-Co(OH)}_2/\text{CC}$ , and (e)  $\text{Ru-10-Co(OH)}_2/\text{CC}$  from the 1<sup>st</sup> to the 100<sup>th</sup> cycle in Ar-saturated 1 M KOH solution. (f) Evolution of the current density at  $-0.3$  V vs. RHE during cycling for  $\text{Co(OH)}_2/\text{CC}$  and  $\text{Ru-x-Co(OH)}_2/\text{CC}$ .

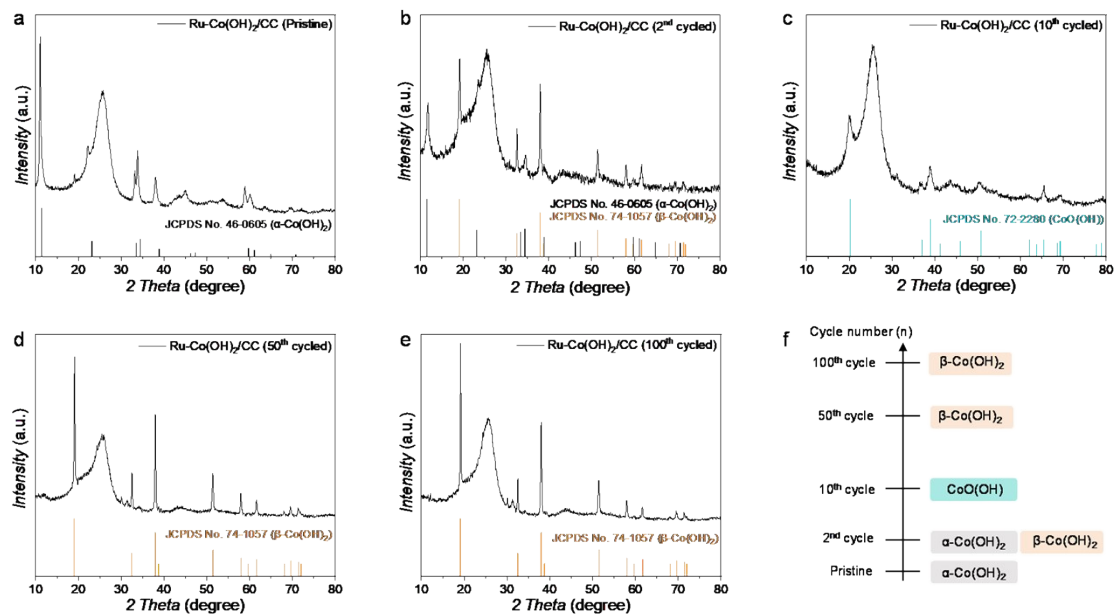

**Fig. S5.** XRD patterns of (a) pristine Ru-Co(OH)<sub>2</sub>/CC, (b) 2<sup>nd</sup> cycled Ru-Co(OH)<sub>2</sub>/CC, (c) 10<sup>th</sup> cycled Ru-Co(OH)<sub>2</sub>/CC, (d) 50<sup>th</sup> cycled Ru-Co(OH)<sub>2</sub>/CC, and (e) 100<sup>th</sup> cycled Ru-Co(OH)<sub>2</sub>/CC in Ar-saturated 1 M KOH solution with 2,000 ppm NO<sub>3</sub><sup>-</sup>. (f) Phase transition of Ru-Co(OH)<sub>2</sub>/CC from pristine to 100<sup>th</sup> CV cycle in Ar-saturated 1 M KOH solution with 2,000 ppm NO<sub>3</sub><sup>-</sup>.

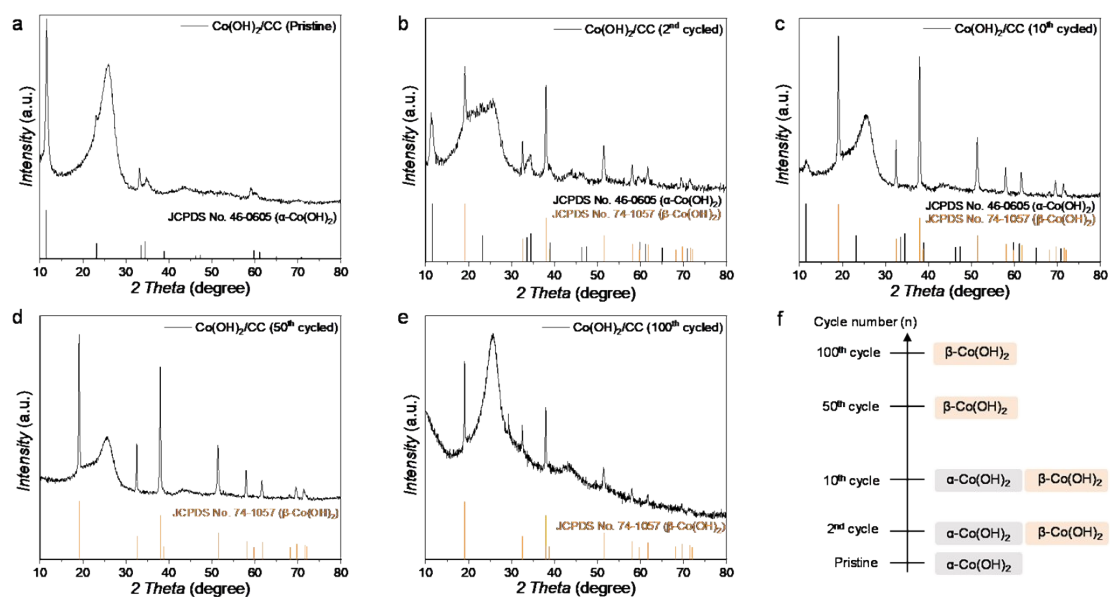

**Fig. S6.** XRD patterns of (a) pristine  $\text{Co(OH)}_2/\text{CC}$ , (b) 2<sup>nd</sup> cycled  $\text{Co(OH)}_2/\text{CC}$ , (c) 10<sup>th</sup> cycled  $\text{Co(OH)}_2/\text{CC}$ , (d) 50<sup>th</sup> cycled  $\text{Co(OH)}_2/\text{CC}$ , and (e) 100<sup>th</sup> cycled  $\text{Co(OH)}_2/\text{CC}$  in Ar-saturated 1 M KOH solution with 2,000 ppm  $\text{NO}_3^-$ . (f) Phase transition of  $\text{Co(OH)}_2/\text{CC}$  from pristine to 100<sup>th</sup> CV cycle in Ar-saturated 1 M KOH solution with 2,000 ppm  $\text{NO}_3^-$ .

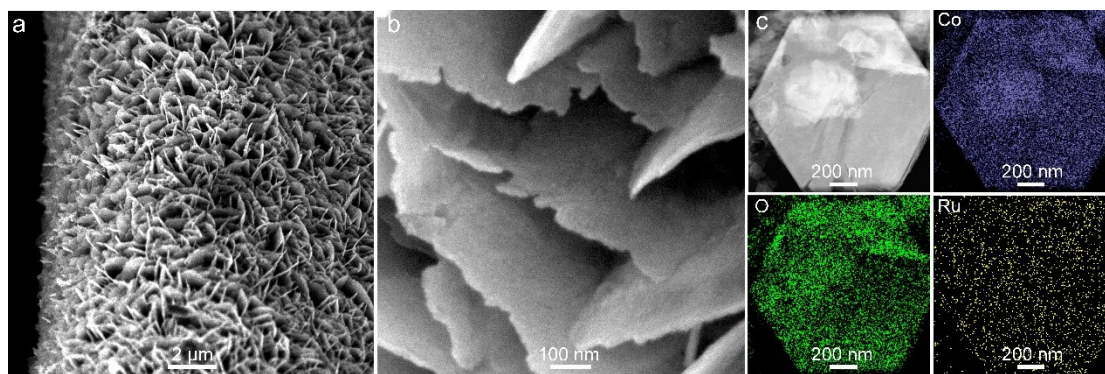

**Fig. S7.** (a) Low-, (b) high-magnification SEM images and (c) TEM and the related elemental mapping images of 10<sup>th</sup> cycled Ru-5-Co(OH)<sub>2</sub>/CC in Ar-saturated 1 M KOH solution with 2,000 ppm NO<sub>3</sub><sup>-</sup>.

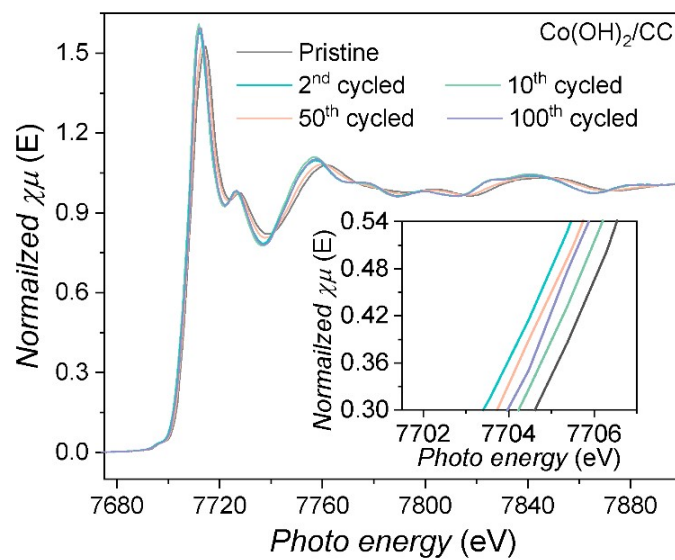

**Fig. S8.** Normalized Co K-edge XANES spectra of the Co(OH)<sub>2</sub>/CC before and after CV cycle in Ar-saturated 1 M KOH solution with 2,000 ppm NO<sub>3</sub><sup>-</sup>.

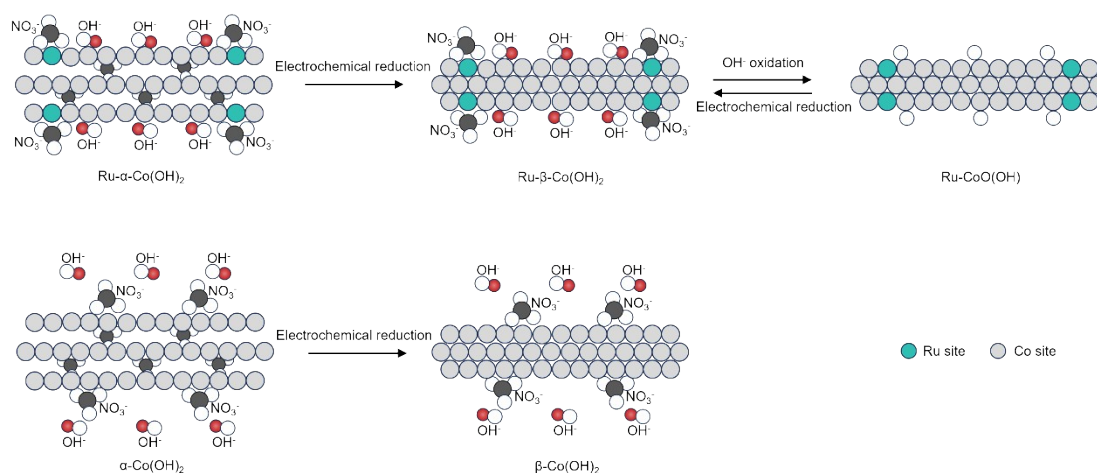

**Fig. S9.** Schematic illustration of the phase translation for Ru-Co(OH)<sub>2</sub> and Co(OH)<sub>2</sub> during NO<sub>3</sub>RR.

Generally, Co(OH)<sub>2</sub> with a sheet-like structure has  $\alpha$ - and  $\beta$ -phases.<sup>4</sup>  $\alpha$ -Co(OH)<sub>2</sub> has an interlayer spacing of  $\sim 7.0$  Å and is intercalated with anions such as chloride, carbonate, or nitrate between the adjacent positively charged layers of Co(OH)<sub>2</sub>. In contrast,  $\beta$ -Co(OH)<sub>2</sub> has a lower interlayer spacing of  $\sim 4.6$  Å without any species between the adjacent layers.<sup>5</sup> Ru doping enhances the OH<sup>-</sup> adsorption capacity of Co(OH)<sub>2</sub>, thereby facilitating its transition to CoO(OH) ( $\text{Co(OH)}_2 + \text{OH}^- \rightarrow \text{CoO(OH)} + \text{H}_2\text{O} + \text{e}^-$ ). A plausible mechanism of the formation of CoO(OH) from layered Co(OH)<sub>2</sub> in Ru-Co(OH)<sub>2</sub>/CC after the 10<sup>th</sup> CV cycle is the oxidation reaction with hydroxide ions.<sup>6-8</sup>

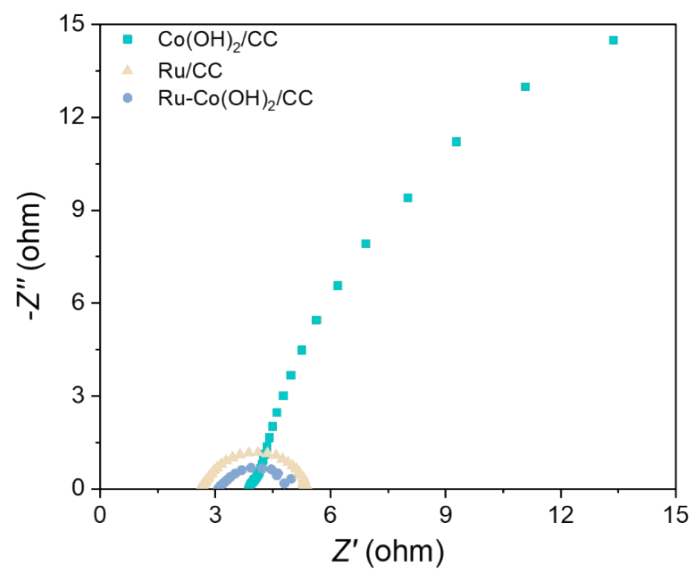

**Fig. S10.** Electrochemical impedance spectra of Co(OH)<sub>2</sub>/CC, Ru-Co(OH)<sub>2</sub>/CC, and Ru/CC at a potential of  $-1.1$  V vs HgO/HgO in Ar-saturated 1 M KOH solution with 2,000 ppm NO<sub>3</sub><sup>-</sup>.



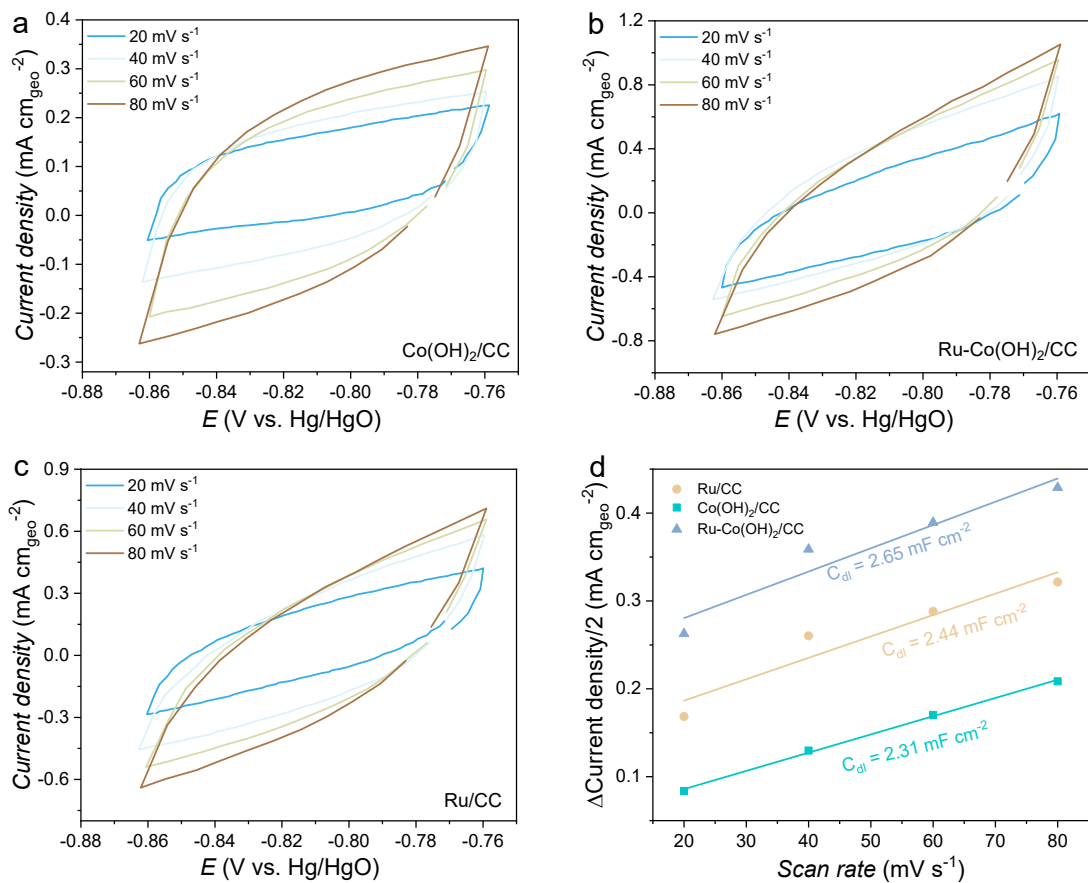

**Fig. S11.** CV curves of (a) Co(OH)<sub>2</sub>/CC, (b) Ru-Co(OH)<sub>2</sub>/CC, and (c) Ru/CC collected at the scan rates of 20, 40, 60, and 80 mV s<sup>-1</sup> in Ar-saturated 1 M KOH solution. (d) Capacitance current density at -0.81 V vs. Hg/HgO as a function of scan rate for Co(OH)<sub>2</sub>/CC, Ru-Co(OH)<sub>2</sub>/CC, and Ru-/CC in Ar-saturated 1 M KOH solution.

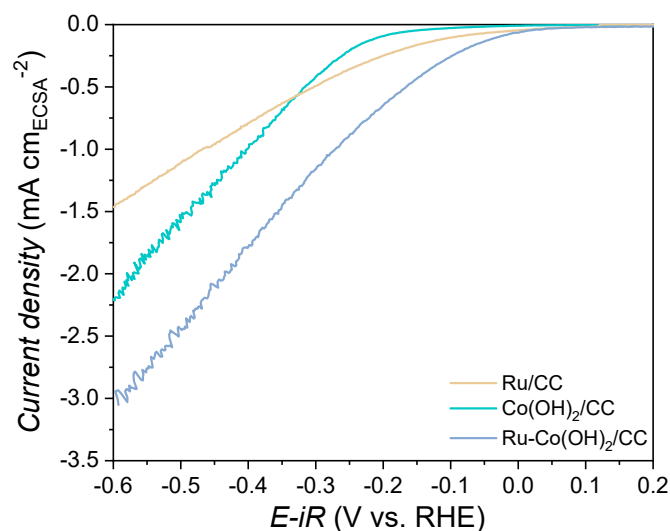

**Fig. S12.** ECSA-normalized LSV curves of Ru-Co(OH)<sub>2</sub>/CC, Co(OH)<sub>2</sub>/CC, and Ru/CC in Ar-saturated 1 M KOH solution with 2,000 ppm NO<sub>3</sub><sup>-</sup>.

The double-layer capacitance values ( $C_{dl}$ ) were measured by cyclic voltammetry curves at the non-Faradaic potential range. The scan rates varied from 20, 40, 60 to 80 mV s<sup>-1</sup>. By plotting half of the difference in double-layer charging current densities against the scan rates, a linear relationship was obtained. The slope is the  $C_{dl}$ . The ECSA was calculated from the double-layer capacitance according to the equation below:

$$ECSA = C_{dl} / C_s$$

Where  $C_s$  is the specific capacitance,  $C_s$  is 40  $\mu\text{F cm}^{-2}$  in 1 M KOH.<sup>9</sup>

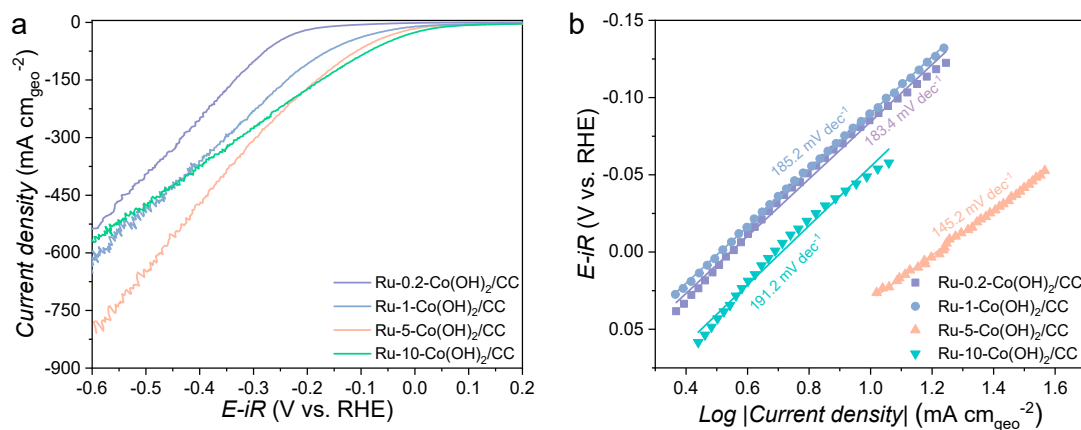

**Fig. S13.** (a) LSV curves and (b) Tafel plots of Co(OH)<sub>2</sub>/CC, Ru-0.2-Co(OH)<sub>2</sub>/CC, Ru-1-Co(OH)<sub>2</sub>/CC, Ru-5-Co(OH)<sub>2</sub>/CC, and Ru-10-Co(OH)<sub>2</sub>/CC in Ar-saturated 1 M KOH solution with 2,000 ppm NO<sub>3</sub><sup>-</sup>.

The enhanced NO<sub>3</sub>RR activity of Ru-5-Co(OH)<sub>2</sub>/CC is also evidenced by the low Tafel slope, as shown in Supplementary Fig. 13b. The Tafel slope of Ru-5-Co(OH)<sub>2</sub>/CC is 145.2 mV dec<sup>-1</sup>, which is lower than those of Ru-0.2-Co(OH)<sub>2</sub>/CC (185.2 mV dec<sup>-1</sup>), Ru-1-Co(OH)<sub>2</sub>/CC (183.4 mV dec<sup>-1</sup>), and Ru-10-Co(OH)<sub>2</sub>/CC (191.2 mV dec<sup>-1</sup>).

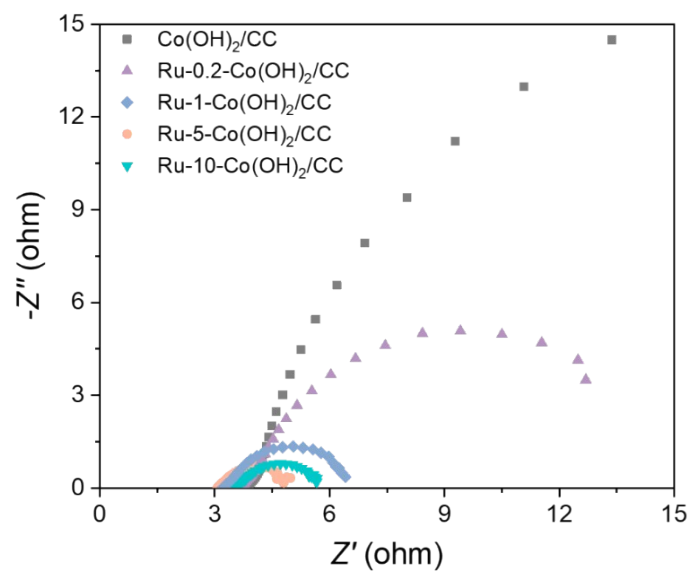

**Fig. S14.** Electrochemical impedance spectra of  $\text{Co(OH)}_2/\text{CC}$ ,  $\text{Ru-0.2-Co(OH)}_2/\text{CC}$ ,  $\text{Ru-1-Co(OH)}_2/\text{CC}$ ,  $\text{Ru-5-Co(OH)}_2/\text{CC}$ , and  $\text{Ru-10-Co(OH)}_2/\text{CC}$  at a potential of  $-1.1$  V vs  $\text{HgO/HgO}$  in Ar-saturated 1 M KOH solution with 2,000 ppm  $\text{NO}_3^-$ .

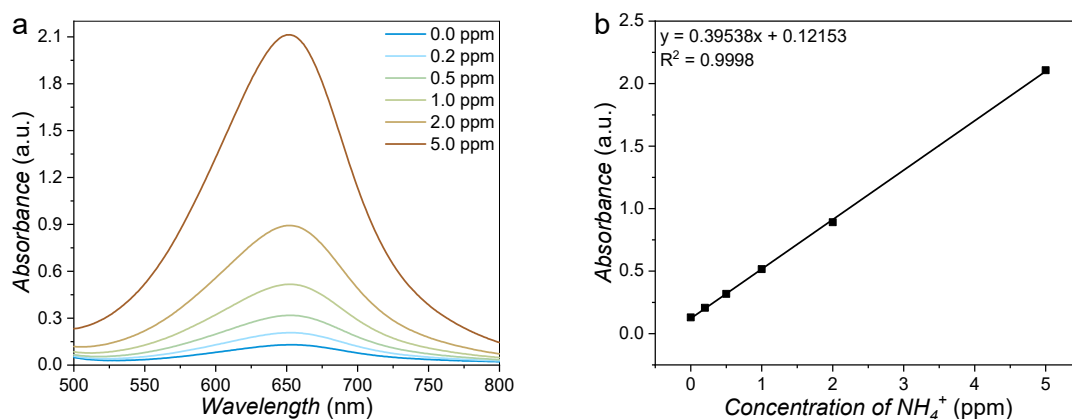

**Fig. S15.** (a) UV-Vis absorption spectra of indophenol assays with  $\text{NH}_4^+$  after incubated for 2 h at room temperature. (b) Calibration curve used for estimation of  $\text{NH}_4^+$  concentrations.

The concentration of  $\text{NH}_4^+$  in the catholyte after electrolysis was quantified using the indophenol blue method.<sup>10</sup> Details of the quantitative experiment are as follows:

- (1) First, 2 mL of the diluted catholyte was added to 2 mL of a 1 M NaOH coloring solution containing 5 wt% salicylic acid and 5 wt% sodium citrate.
- (2) Then, 1 mL of 0.05 M NaClO oxidizing solution and 0.2 mL of 1 wt%  $\text{Na}_2\text{Fe}(\text{CN})_5\text{NO} \cdot 2\text{H}_2\text{O}$  catalyst solution were added to the above mixture.
- (3) After standing for 2 h in dark conditions, the absorbance at 655 nm was measured using UV-Vis spectroscopy. The fitting curve ( $y = 0.39538x + 0.12153$ ,  $R^2 = 0.9998$ ) shows good linear relationship between absorbance value and  $\text{NH}_4^+$  concentration.

Calculation of yield rate and FE

FE is calculated according to the following equations:

$$FE_{\text{NH}_3} = \frac{8 \times F \times C_{\text{NH}_3} \times V \times 10^{-6}}{17 \times Q} \times 100\%$$

Here,  $F$  is the Faradic constant ( $96485 \text{ C mol}^{-1}$ ),  $C_{\text{NH}_3}$  is the concentrations of  $\text{NH}_3$ ,  $V$  is the electrolyte volume in the cathode compartment (50 mL),  $Q$  is the total charge passed, and 17 is the molar masses of  $\text{NH}_3$ .

The  $\text{NH}_3$  yield rate is determined as follows:

$$\text{NH}_3 \text{ yield rate} = (C \times V) / (17 \times t \times A)$$

Here,  $t$  is the electrolysis time and  $A$  is the electrode area ( $0.5 \times 0.5 \text{ cm}^2$ ).

The partial current density for  $\text{NH}_3$  is given by:

$$i_{\text{NH}_3} = i \times FE_{\text{NH}_3}$$

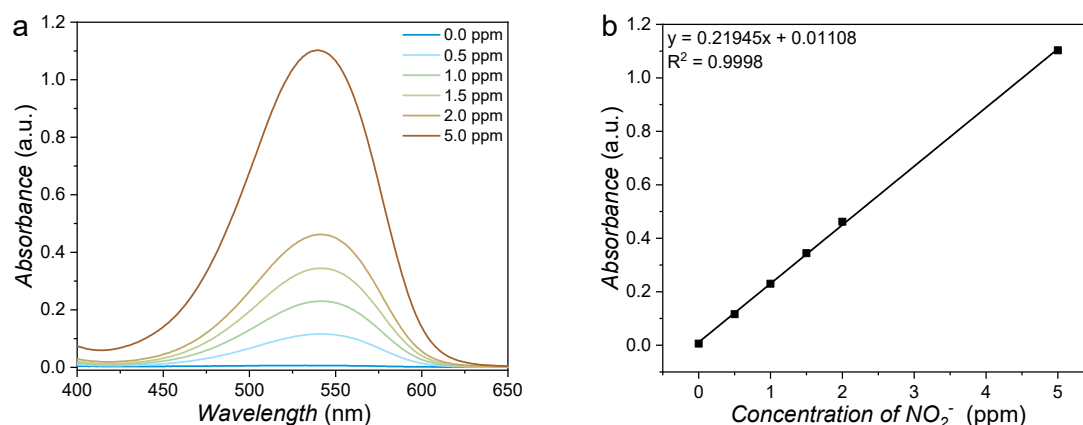

**Fig. S16.** The concentration-absorbance UV-Vis calibration curve of  $\text{NO}_2^-$  using different concentration of  $\text{KNO}_2$  solutions as standards. (a) UV-Vis absorption spectra of various  $\text{NO}_2^-$  concentrations. (b) Calibration curve used for quantification of  $\text{NO}_2^-$  concentrations.

The concentration of  $\text{NO}_2^-$  in the catholyte after electrolysis was quantified using the Griess method.<sup>11</sup> Details of the quantitative experiment are as follows:

- (1) First, a mixture of N-(1-naphthyl)-ethylenediamine dihydrochloride (0.1 g), sulfonamide (1.0 g),  $\text{H}_3\text{PO}_4$  (2.94 mL), and deionized water (50 mL) was prepared to serve as a color reagent.
- (2) Then, catholyte after electrolysis was diluted tenfold (1.0 mL) and mixed with 1.0 mL of color reagent and 2.0 mL of  $\text{H}_2\text{O}$ .
- (3) After standing for 10 min, the absorbance at 540 nm was measured using UV-Vis spectroscopy. The  $\text{NO}_2^-$  concentration was quantified by using standard  $\text{NO}_2^-$  solutions ( $y = 0.21945x + 0.01108$ ,  $R^2 = 0.9998$ ).

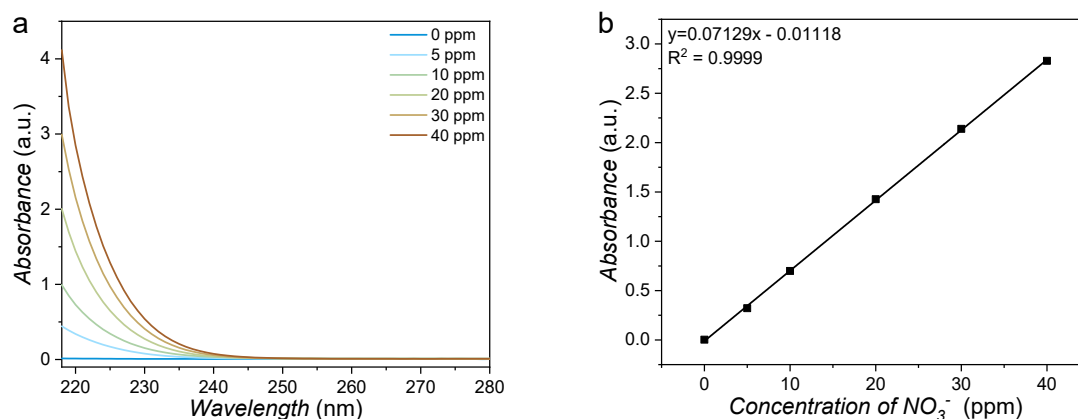

**Fig. S17.** The concentration-absorbance UV-Vis calibration curve of  $\text{NO}_3^-$  using different concentration of  $\text{KNO}_3$  solutions as standards. (a) UV-Vis absorption spectra of various  $\text{NO}_3^-$  concentrations. (b) Calibration curve used for quantification of  $\text{NO}_3^-$  concentrations.

The concentration of  $\text{NO}_3^-$  in the catholyte after electrolysis was quantified using UV-Vis spectrophotometry according to the standard method.<sup>12</sup> Details of the quantitative experiment are as follows:

- (1) First, a certain amount of electrolyte was taken out from the cathodic reaction cell and diluted to 2 mL to the detection range.
- (2) Then, 40  $\mu\text{L}$  of 1 M HCl with 4.0  $\mu\text{L}$  of 0.8wt% sulfamic acid solution was added and mixed with 2 mL of the diluted electrolyte, then allowed to stand for 20 min under ambient conditions.
- (3) The absorption spectrum was measured using a UV-Vis spectrophotometer and the absorption intensities at a wavelength of 220 nm and 275 nm were recorded. The final absorbance value was calculated by this equation:  $A = A_{220 \text{ nm}} - 2A_{275 \text{ nm}}$ . The concentration-absorbance curve was calibrated using a series of standard  $\text{KNO}_3$  solutions and the  $\text{KNO}_3$  crystal was dried at 110  $^\circ\text{C}$  for 2 h in advance. The  $\text{NO}_3^-$  concentration was quantified using standard  $\text{NO}_3^-$  solutions ( $y = 0.07129x - 0.01118$ ,  $R^2 = 0.9999$ ).

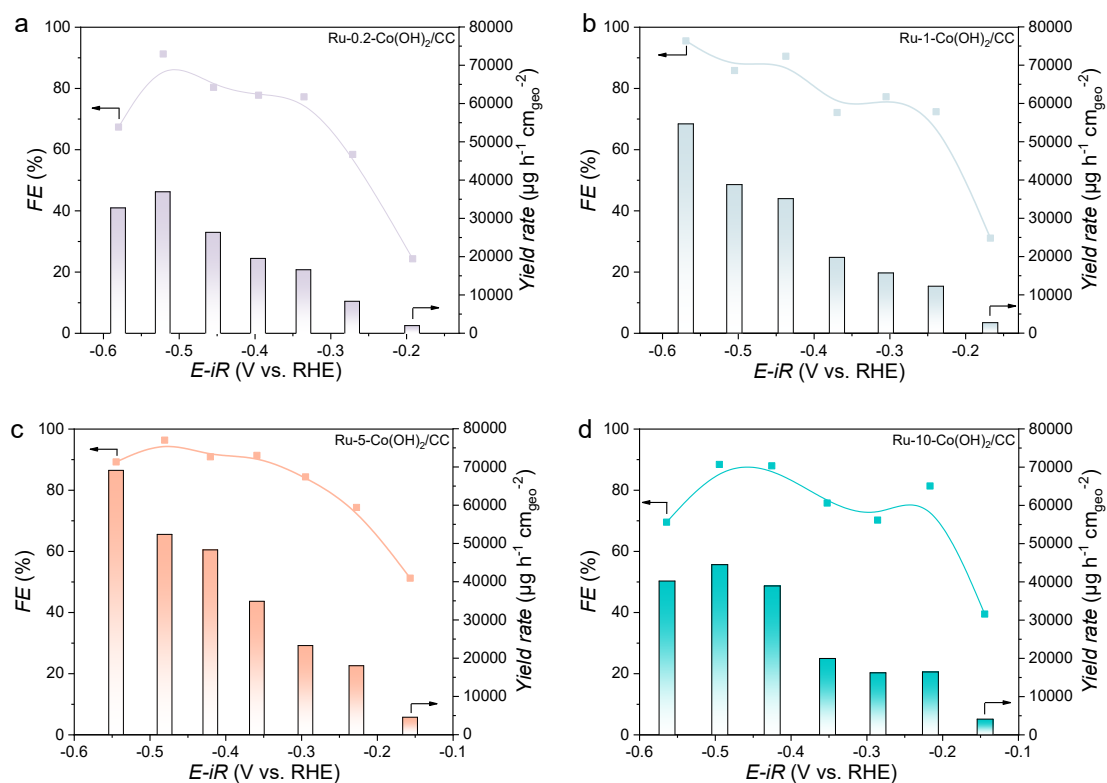

**Fig. S18.**  $\text{NH}_3$  yield rates and FEs of (a) Ru-0.2-Co(OH)<sub>2</sub>/CC, (b) Ru-1-Co(OH)<sub>2</sub>/CC, (c) Ru-5-Co(OH)<sub>2</sub>/CC, and (d) Ru-10-Co(OH)<sub>2</sub>/CC in 1 M KOH solution with 2,000 ppm  $\text{NO}_3^-$ .



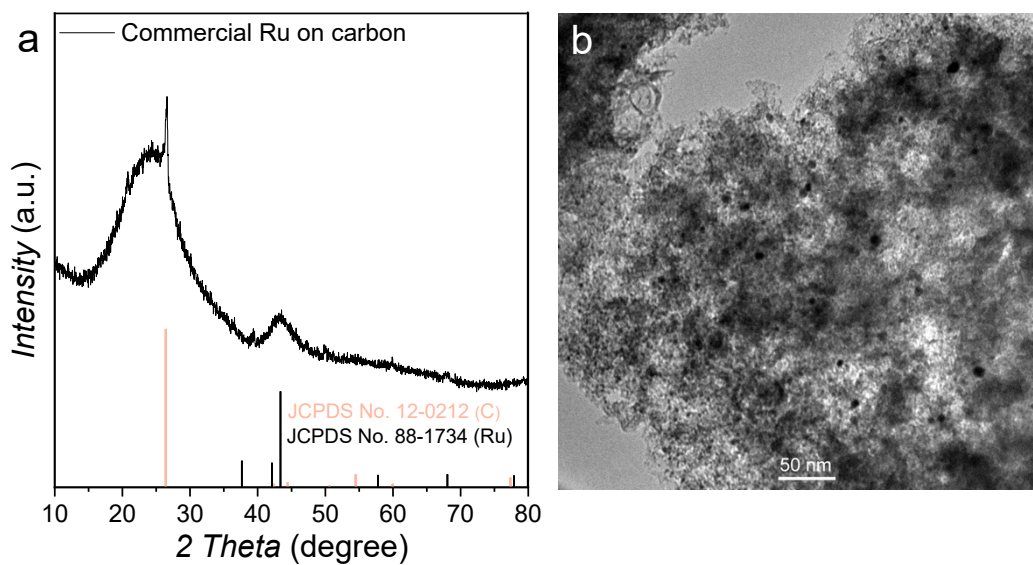

**Fig. S19.** (a) XRD pattern and (b) TEM image of commercial Ru on carbon.

For Ru/CC, a commercial Ru/C catalyst (5 mg) was dispersed in 1 mL of a solvent mixture (5 wt% Nafion solution, isopropanol, and deionized water in a volumetric ratio of 0.125:1:4). The mixture was sonicated for at least 30 min to form a homogeneous ink. Subsequently, 200  $\mu\text{L}$  of Ru/C ink was drop-cast onto both sides of the CC.

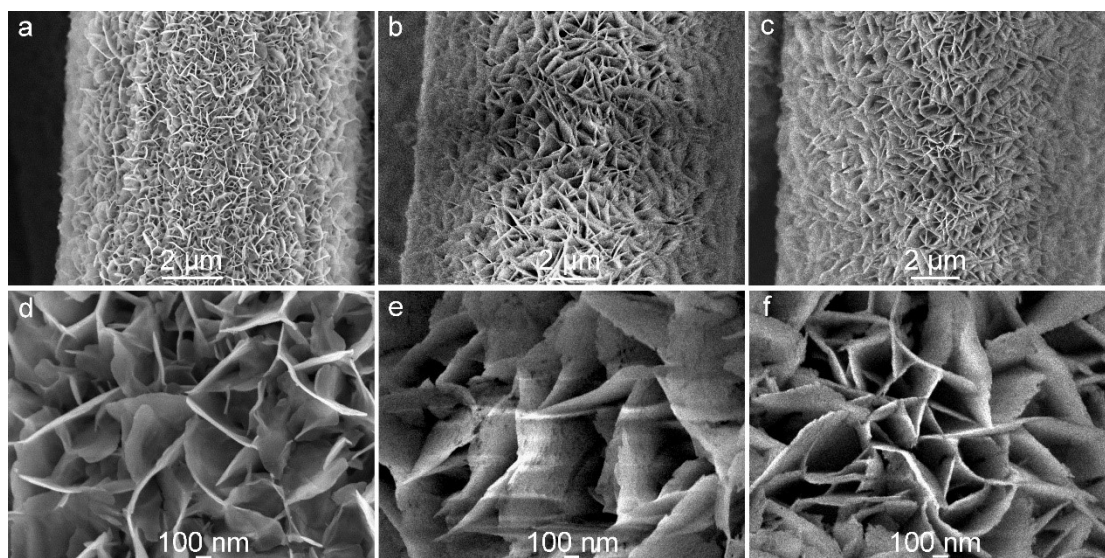

**Fig. S20.** SEM images of (a, d) Pd-Co(OH)<sub>2</sub>/CC, (b, e) Ir-Co(OH)<sub>2</sub>/CC, and (c, f) Rh-Co(OH)<sub>2</sub>/CC.

A piece of Co(OH)<sub>2</sub>/CC ( $2 \times 3 \text{ cm}^2$ ) was immersed in 20 mL of 5 mM aqueous solution of the corresponding metal precursor—IrCl<sub>3</sub>·xH<sub>2</sub>O for Ir-Co(OH)<sub>2</sub>, PdCl<sub>2</sub> for Pd-Co(OH)<sub>2</sub>, and RhCl<sub>3</sub>·xH<sub>2</sub>O for Rh-Co(OH)<sub>2</sub>—for 20 minutes. The resulting materials were then thoroughly rinsed with deionized water and dried at 70 °C overnight.

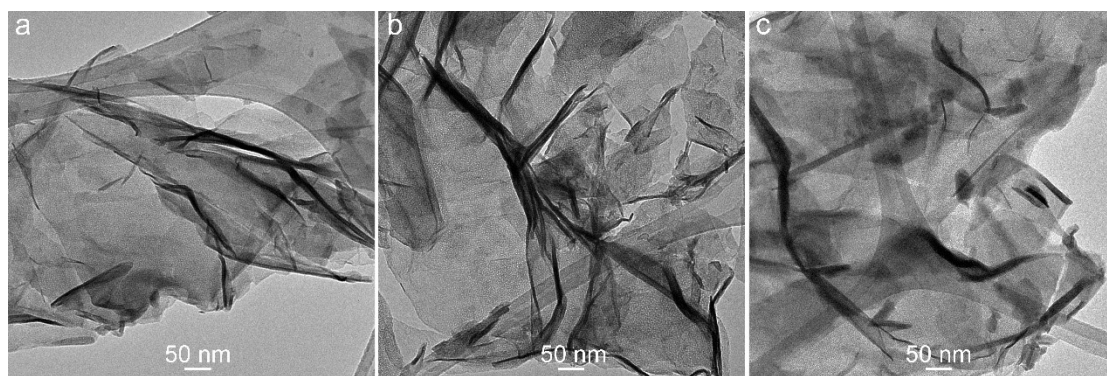

**Fig. S21.** TEM images of (a) Pd-Co(OH)<sub>2</sub>, (b) Ir-Co(OH)<sub>2</sub>, and (c) Rh-Co(OH)<sub>2</sub>.

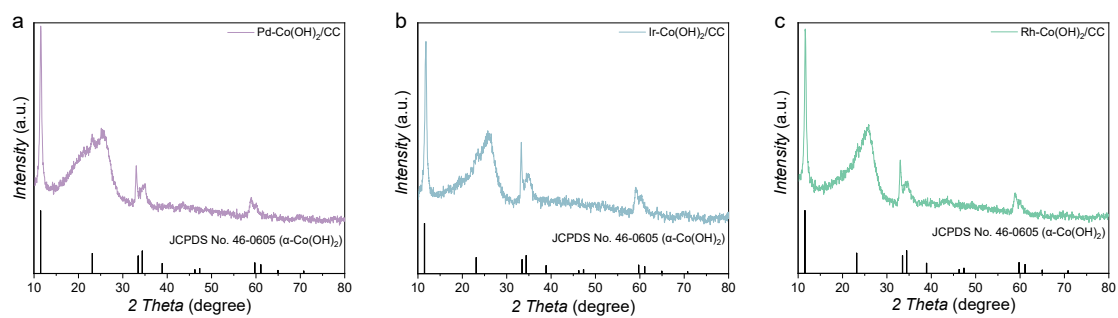

**Fig. S22.** XRD patterns of (a) Pd-Co(OH)<sub>2</sub>/CC, (b) Ir-Co(OH)<sub>2</sub>/CC, and (c) Rh-Co(OH)<sub>2</sub>/CC.

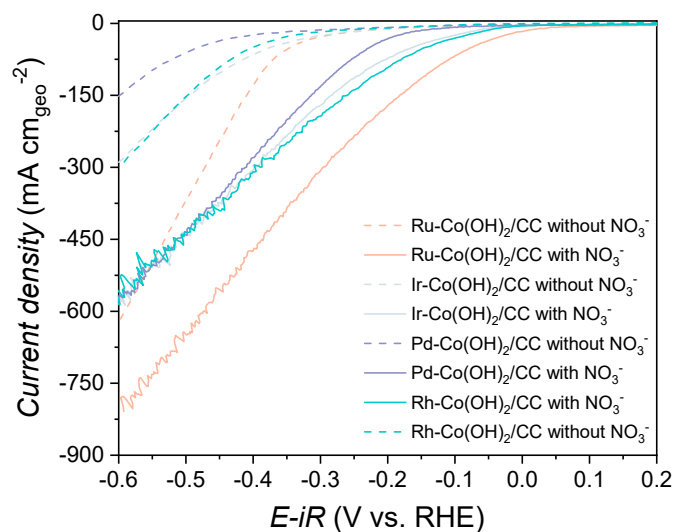

**Fig. S23.** LSV curves of Pd-Co(OH)<sub>2</sub>/CC, Ir-Co(OH)<sub>2</sub>/CC, Rh-Co(OH)<sub>2</sub>/CC, and Ru-Co(OH)<sub>2</sub>/CC in Ar-saturated 1 M KOH solution with and without 2,000 ppm NO<sub>3</sub><sup>-</sup>.

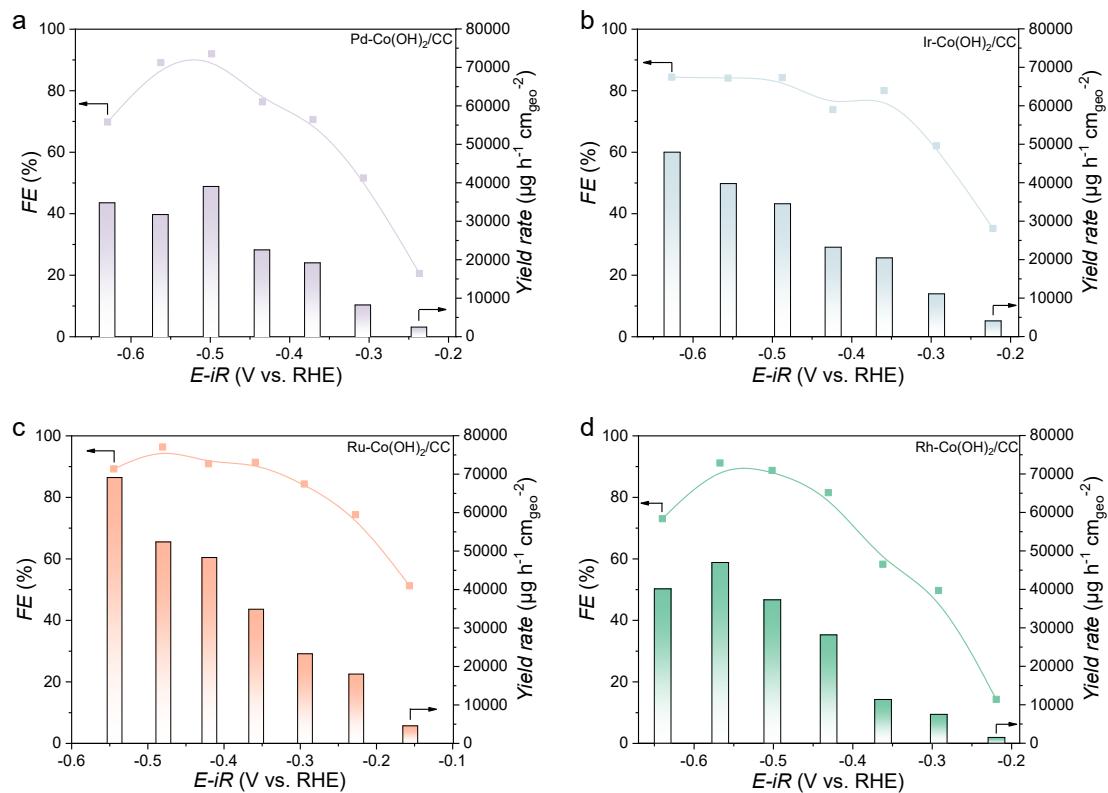

**Fig. S24.** NH<sub>3</sub> yield rates and FEs of (a) Pd-Co(OH)<sub>2</sub>/CC, (b) Ir-Co(OH)<sub>2</sub>/CC, (c) Ru-Co(OH)<sub>2</sub>/CC, and (d) Rh-Co(OH)<sub>2</sub>/CC in 1 M KOH solution with 2,000 ppm NO<sub>3</sub><sup>-</sup>.

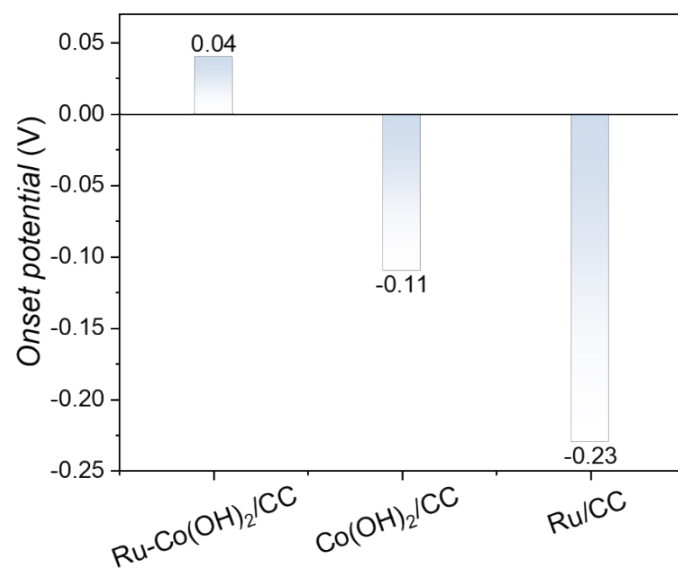

**Fig. S25.** Onset potential of Ru-Co(OH)<sub>2</sub>/CC, Co(OH)<sub>2</sub>/CC, and Ru/CC for NO<sub>3</sub>RR in Ar-saturated 1 M KOH solution with 2,000 ppm NO<sub>3</sub><sup>-</sup>.

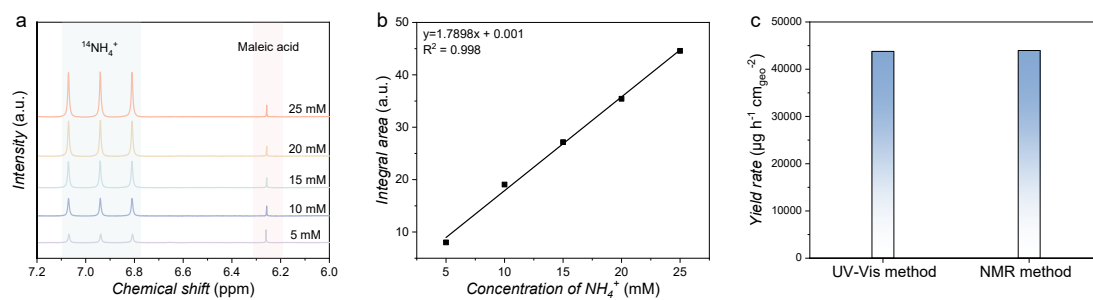

**Fig. S26.** Standard curve of  $^{14}\text{NH}_4^+$  quantification by  $^1\text{H}$  NMR. (a)  $^1\text{H}$  NMR spectra of  $^{14}\text{NH}_4$  at different concentrations and (b) the corresponding standard curve. (c)  $\text{NH}_3$  yield rates determined by  $^1\text{H}$ -NMR spectroscopy and UV-Vis spectroscopy of Ru-Co(OH) $_2$ /CC at  $-0.48$  V vs. RHE in 1 M KOH solution with 2,000 ppm  $\text{NO}_3^-$ .



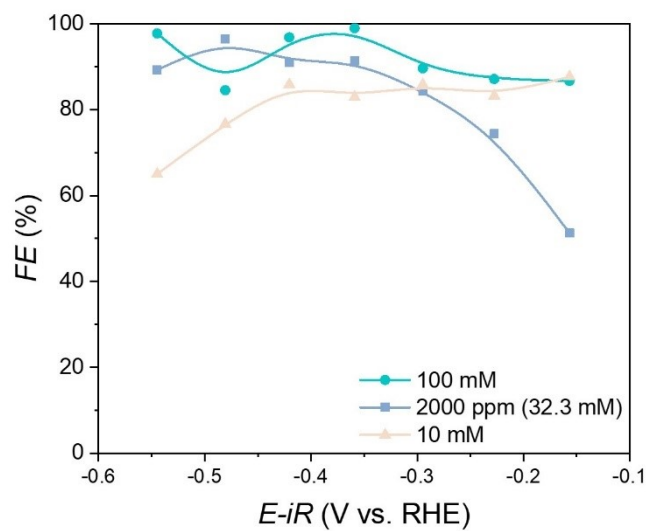

**Fig. S27.**  $\text{NH}_3$  FEs of  $\text{Ru-Co(OH)}_2/\text{CC}$  in Ar-saturated 1 M KOH solution with different  $\text{NO}_3^-$  concentration.

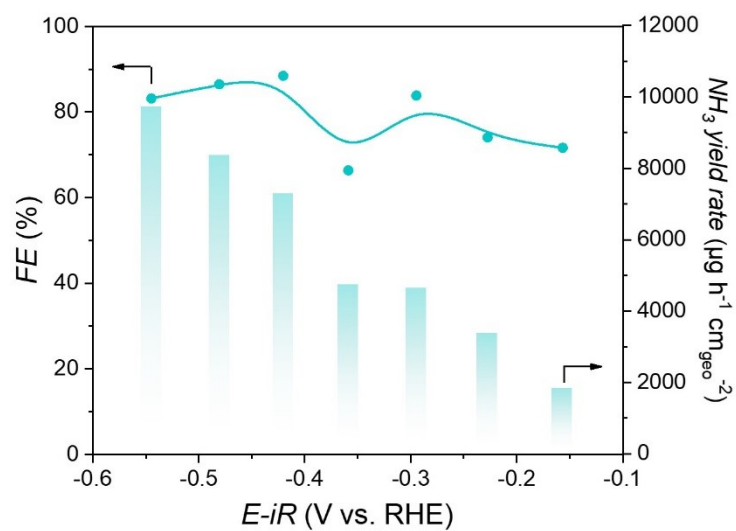

**Fig. S28.**  $\text{NH}_3$  yield rates and FEs of  $\text{Ru-Co(OH)}_2/\text{CC}$  in Ar-saturated 0.05 M  $\text{Na}_2\text{SO}_4$  solution with 2,000 ppm  $\text{NO}_3^-$ .

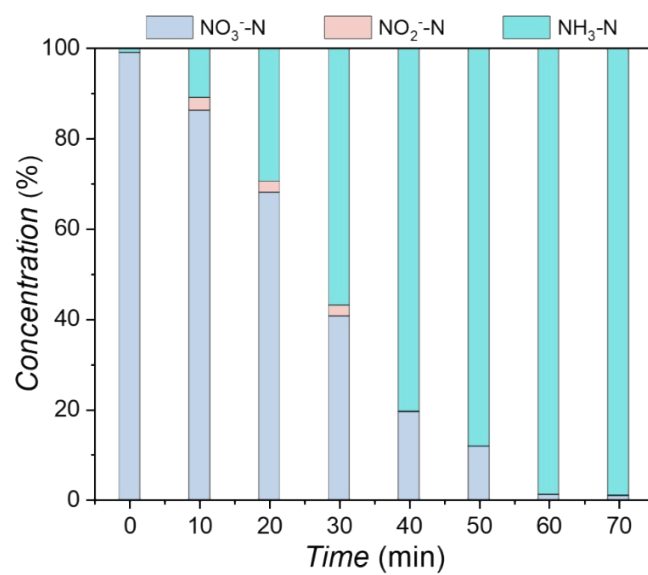

**Fig. S29.** Product ratios at different times using Ru-Co(OH)<sub>2</sub>/CC as the catalyst for complete NO<sub>3</sub><sup>-</sup> conversion. The cell is operated under -0.48 V vs. RHE with an initial 2,000 ppm NO<sub>3</sub><sup>-</sup> in Ar-saturated 1 M KOH solution.

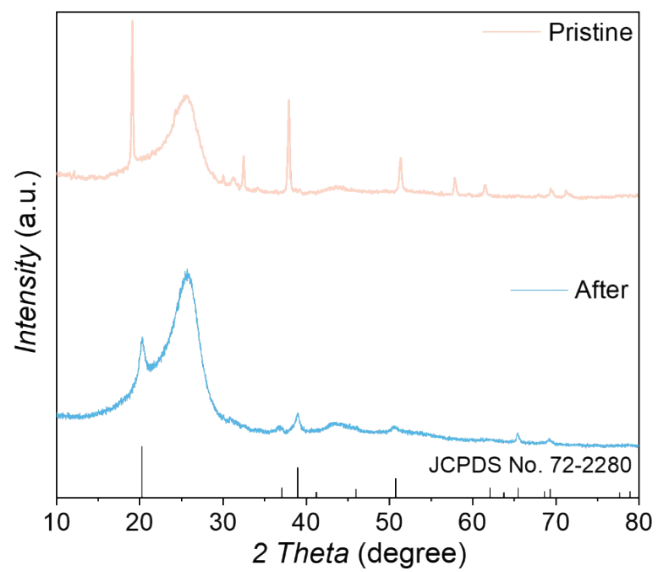

**Fig. S30.** XRD patterns of pristine and post-NO<sub>3</sub>RR Ru-Co(OH)<sub>2</sub>/CC in Ar-saturated 1 M KOH solution with 2,000 ppm NO<sub>3</sub><sup>-</sup>.

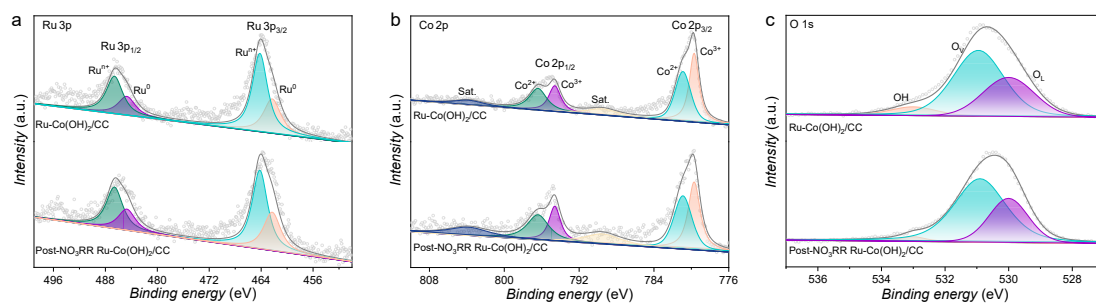

**Fig. S31.** High-resolution X-ray photoelectron spectra of pristine and post-NO<sub>3</sub>RR Ru-Co(OH)<sub>2</sub>/CC in Ar-saturated 1 M KOH solution with 2,000 ppm NO<sub>3</sub><sup>-</sup>.

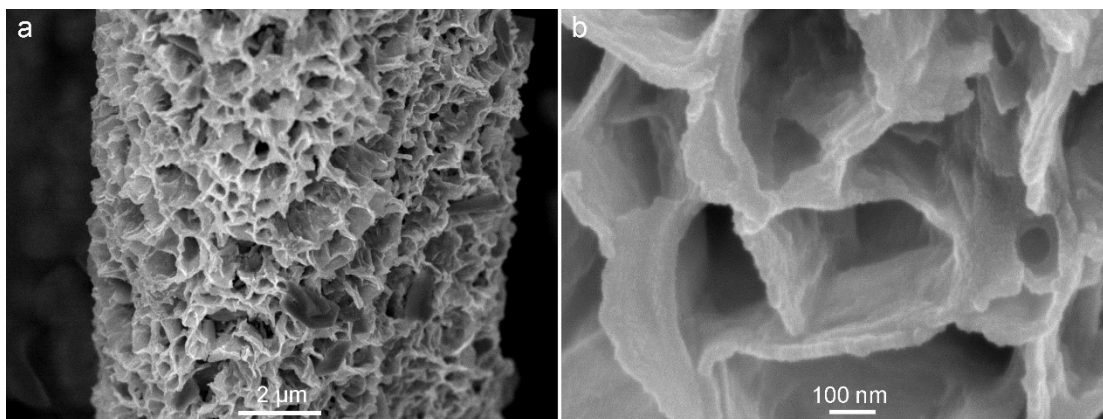

**Fig. S32.** (a) Low- and (b) high-magnification SEM images of post-NO<sub>3</sub>RR Ru-Co(OH)<sub>2</sub>/CC in Ar-saturated 1 M KOH solution with 2,000 ppm NO<sub>3</sub><sup>-</sup>.

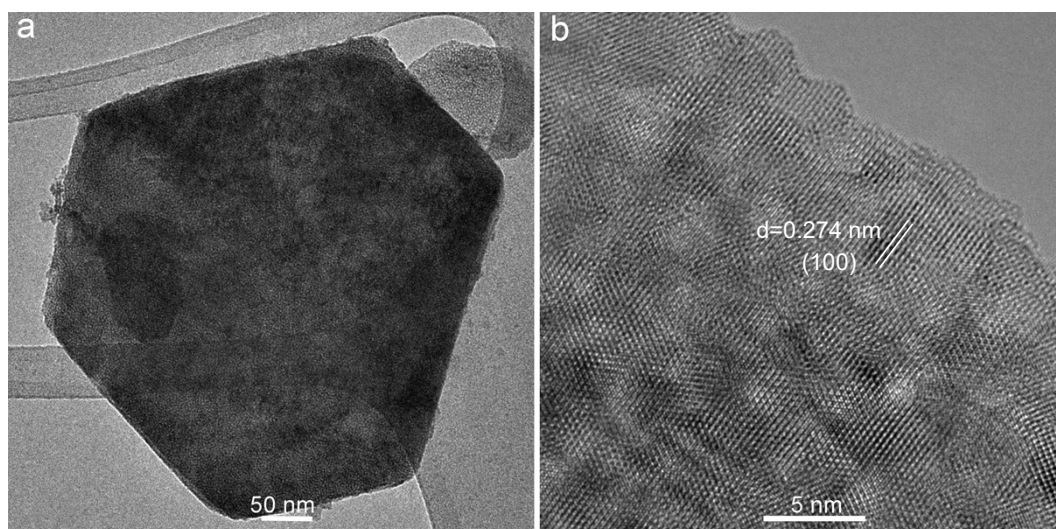

**Fig. S33.** (a) TEM and (b) HRTEM images of post-NO<sub>3</sub>RR Ru-Co(OH)<sub>2</sub>/CC in Ar-saturated 1 M KOH solution with 2,000 ppm NO<sub>3</sub><sup>-</sup>.

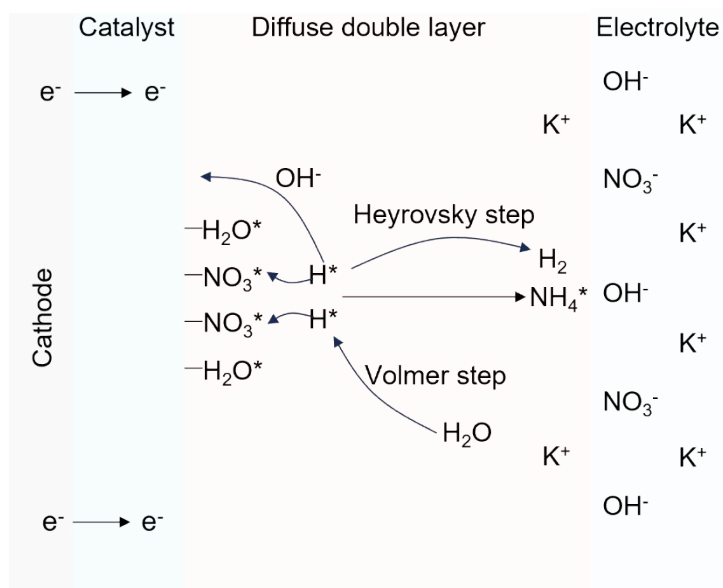

**Fig. S34.** Equivalent circuit model used in fitting the electrochemical impedance spectra and schematic diagram of the proposed reaction mechanism over Ru-Co(OH)<sub>2</sub>/CC.

The cathodic resistance consists of four components: (i) resistance to electron transfer from the cathode to the catalytic sites; (ii) resistance associated with the adsorption of intermediates at the reaction interface; (iii) resistance to electron transfer from the reaction interface to the intermediates; and (iv) diffusion resistance of products in the electrolyte.<sup>13,14</sup>



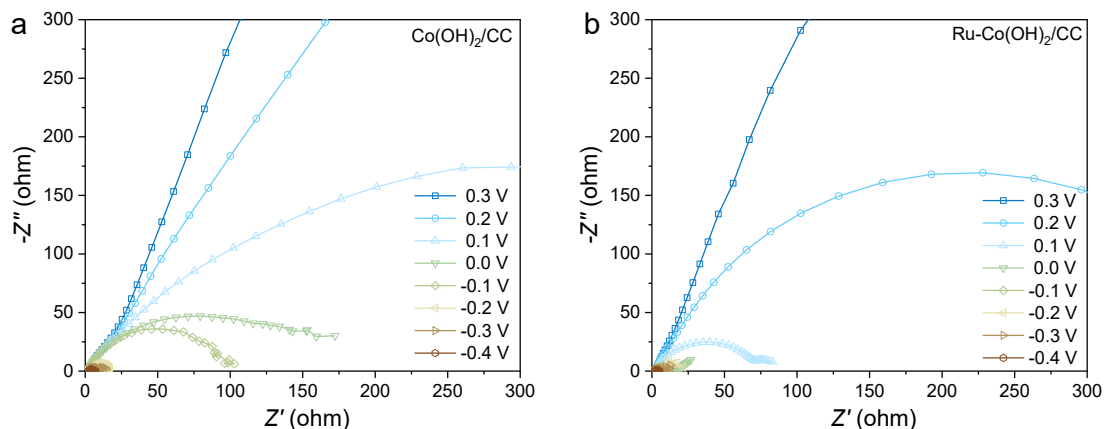

**Fig. S35.** Nyquist plots of (a)  $\text{Co(OH)}_2/\text{CC}$  and (b)  $\text{Ru-Co(OH)}_2/\text{CC}$  in Ar-saturated 1 M KOH solution with 2,000 ppm  $\text{NO}_3^-$ .

The Nyquist spectra of  $\text{Co(OH)}_2/\text{CC}$  exhibited nearly oblique lines at low potentials from 0.3 V to 0.2 V vs. RHE in Ar-saturated 1 M KOH solution with 2,000 ppm  $\text{NO}_3^-$ , suggesting high resistance at the interface between the electrode and electrolyte (Fig. S35a). Notably, the charge-transfer resistance of  $\text{Ru-Co(OH)}_2/\text{CC}$  in Ar-saturated 1 M KOH solution with 2,000 ppm  $\text{NO}_3^-$  was significantly smaller than that of  $\text{Co(OH)}_2/\text{CC}$  under the same bias (Fig. S35b).

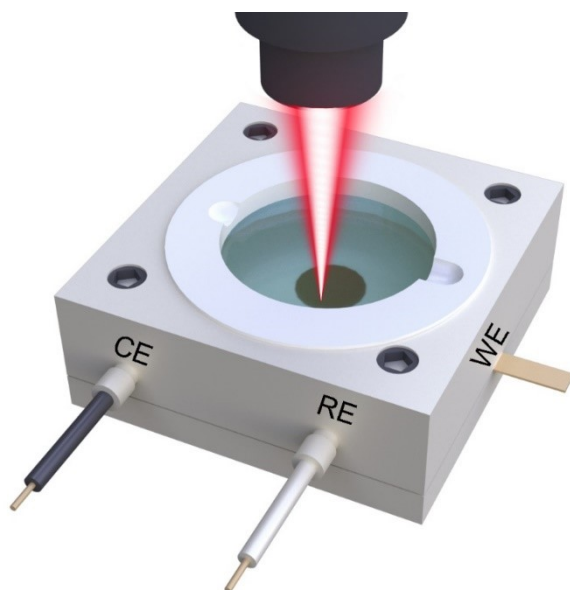

**Fig. S36.** Schematic of a custom in situ electrochemical Raman cell.

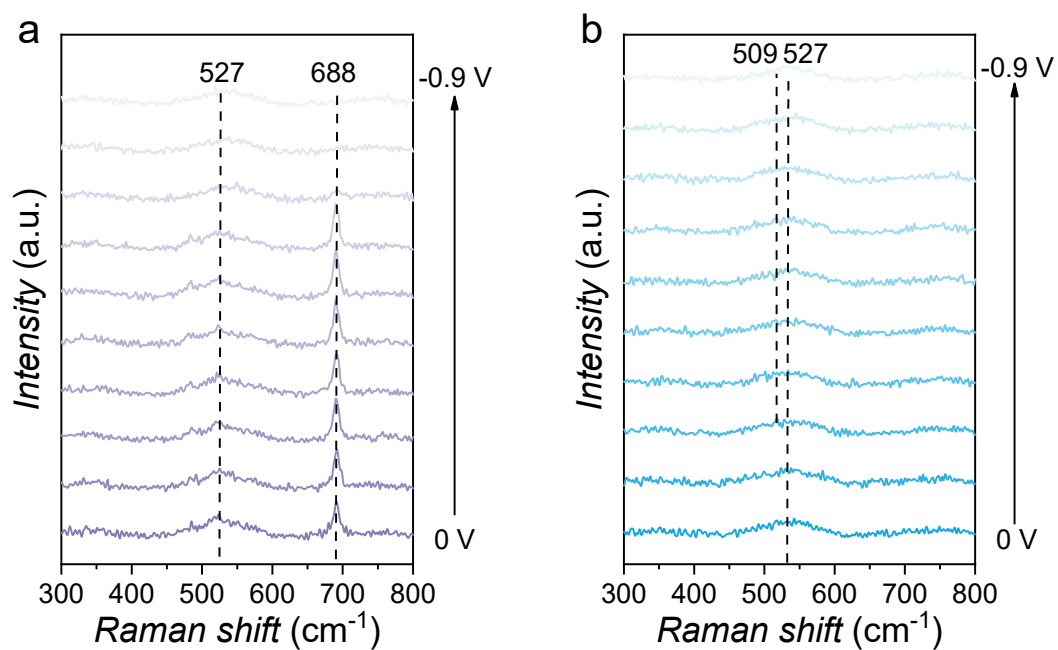

**Fig. S37.** In situ Raman spectra of (a)  $\text{Co(OH)}_2/\text{CC}$  and (b)  $\text{Ru-Co(OH)}_2/\text{CC}$  in Ar-saturated 1 M KOH solution at a series of applied potentials.

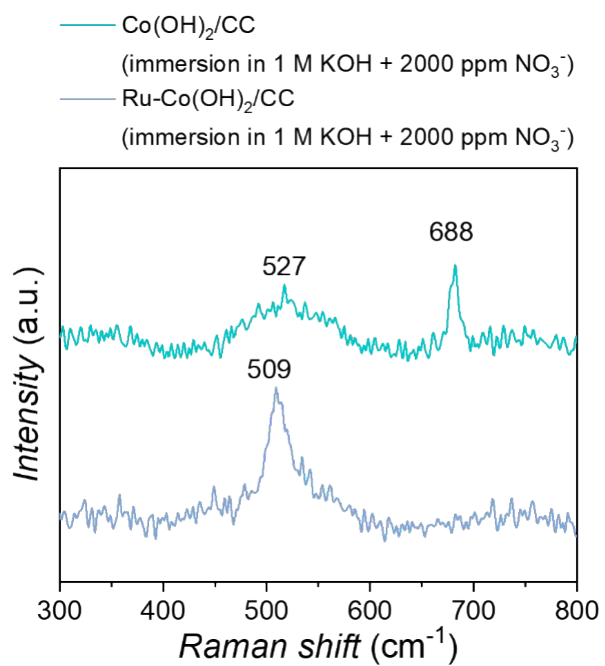

**Fig. S38.** Raman spectra of Co(OH)<sub>2</sub>/CC and Ru-Co(OH)<sub>2</sub>/CC immersed in 1 M KOH solution with 2,000 ppm NO<sub>3</sub><sup>-</sup>.

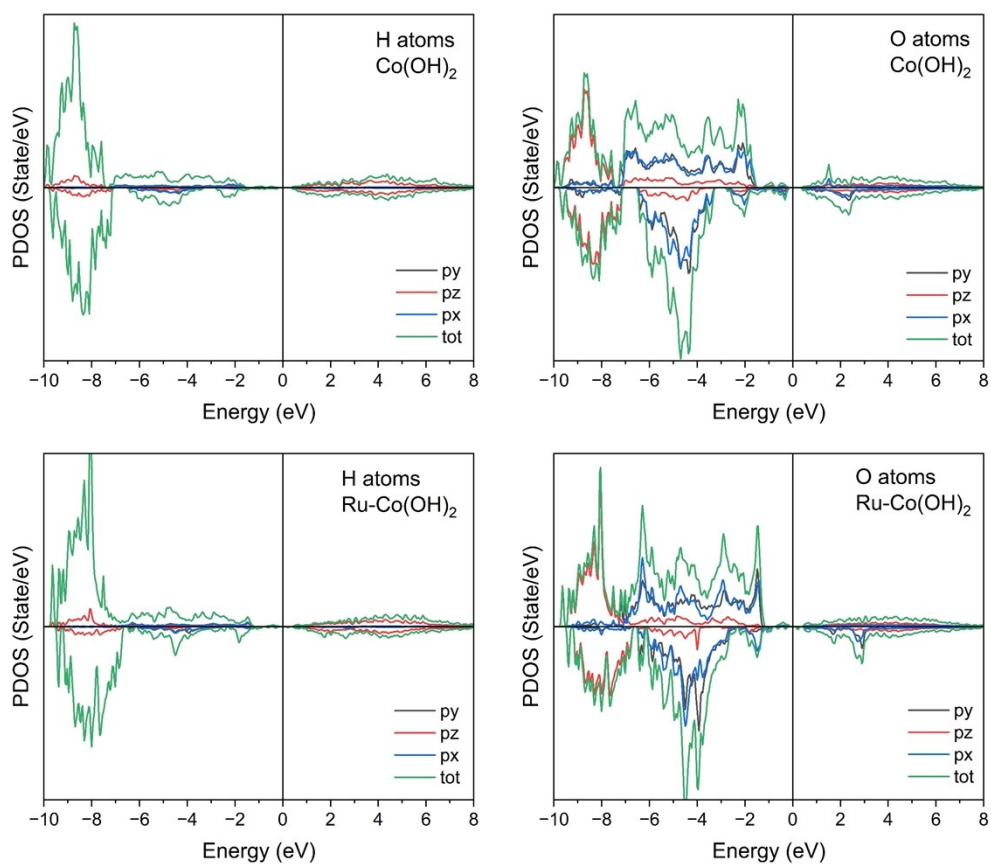

**Fig. S39.** Partial density of states of H and O atoms of  $\text{Co(OH)}_2$  and  $\text{Ru-Co(OH)}_2$ .

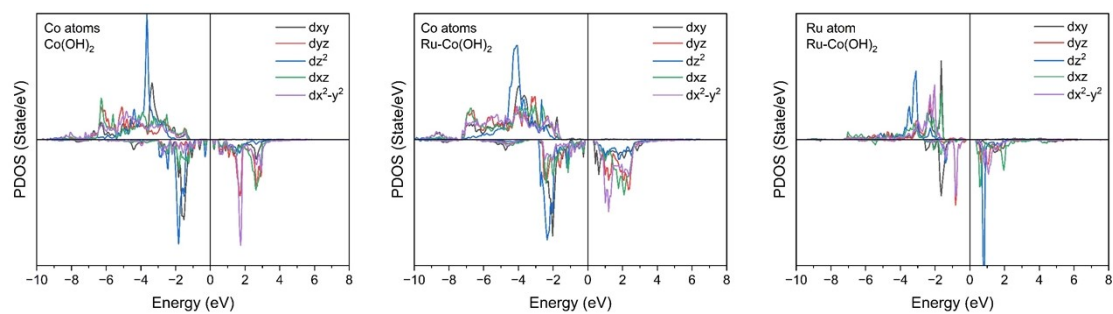

**Fig. S40.** Partial density of states of Co and Ru atoms of  $\text{Co(OH)}_2$  and  $\text{Ru-Co(OH)}_2$ .

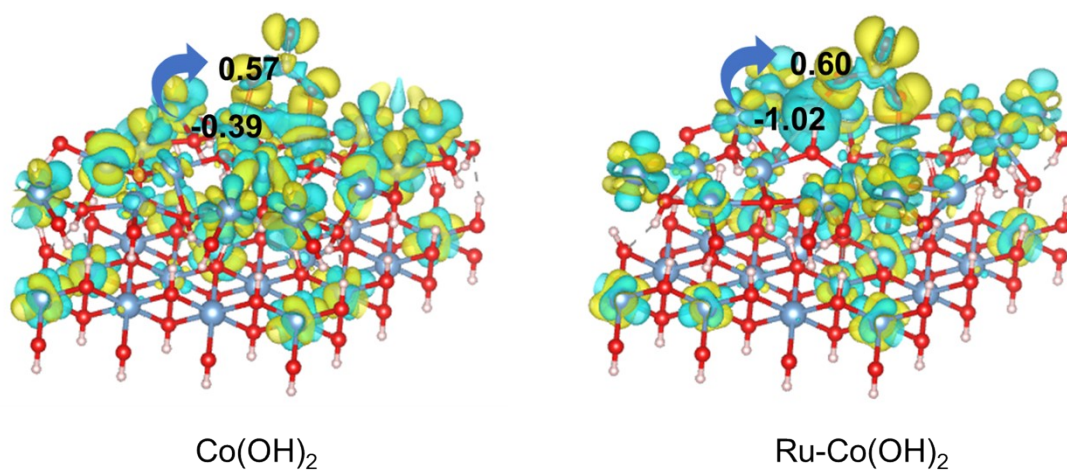

**Fig. S41.** Difference charge density and Bader of \*NO<sub>3</sub> of Co(OH)<sub>2</sub> and Ru-Co(OH)<sub>2</sub>, isosurface level is 0.02 e/Å<sup>3</sup>.

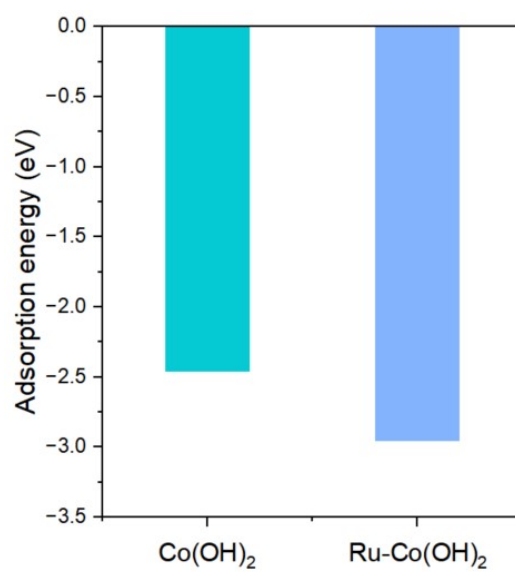

**Fig. S42.** The  $\text{NO}_3^-$  adsorption energy of  $\text{Co(OH)}_2$  and  $\text{Ru-Co(OH)}_2$ .



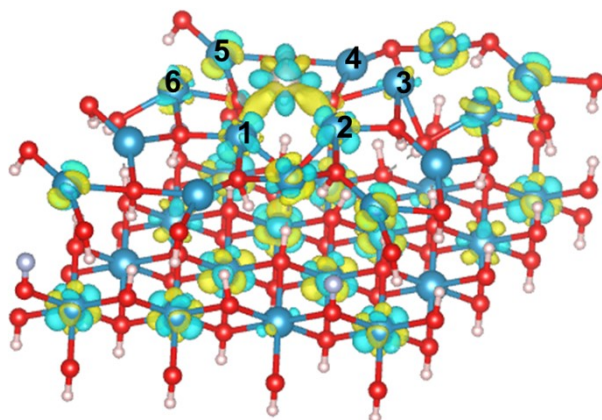

**Fig. S43.** Difference charge density of Ru-Co(OH)<sub>2</sub>, isosurface level is 0.1 e/Å<sup>3</sup>.

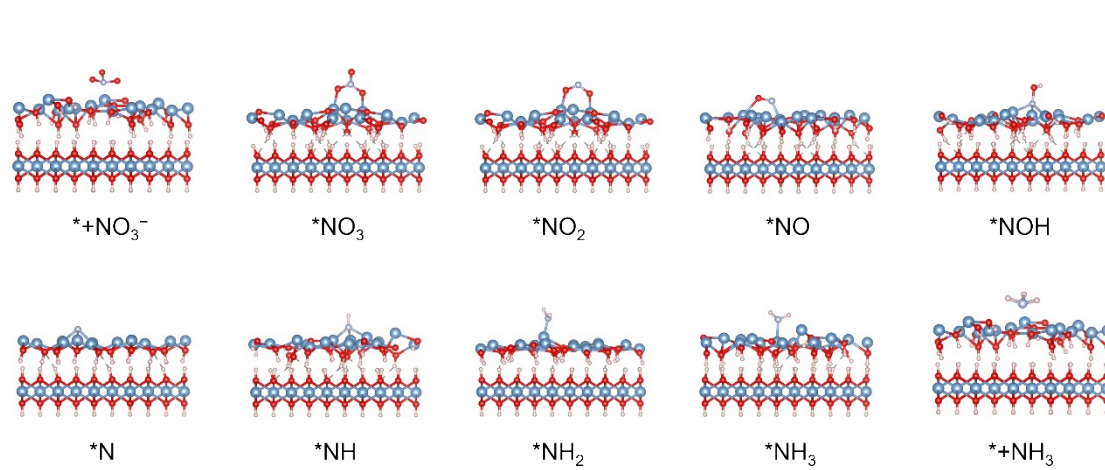

**Fig. S44.** Lattice structure of Co(OH)<sub>2</sub> for NO<sub>3</sub>RR.

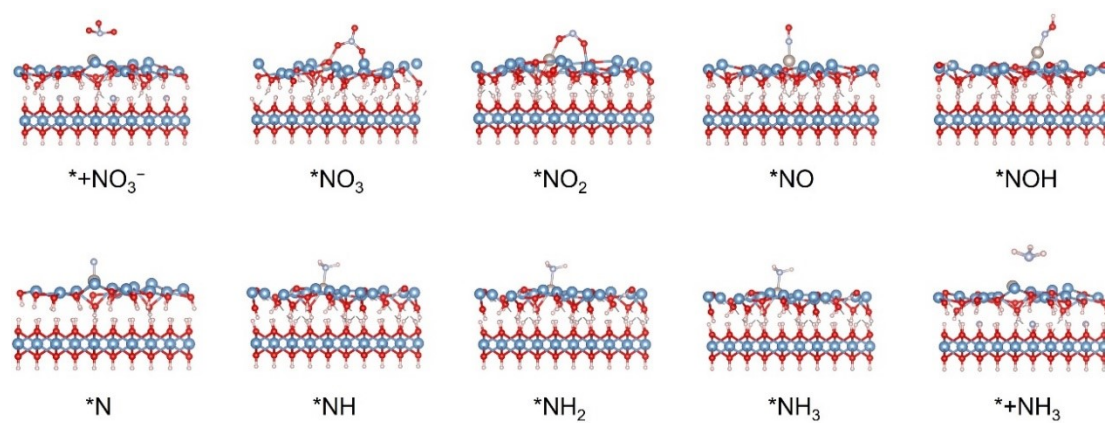

**Fig. S45.** Lattice structure of Ru-Co(OH)<sub>2</sub> for NO<sub>3</sub>RR.

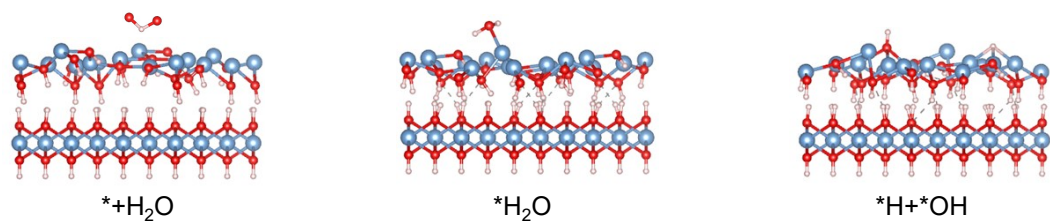

**Fig. S46.** Lattice structure of  $Co(OH)_2$  for hydrogen evolution reaction.

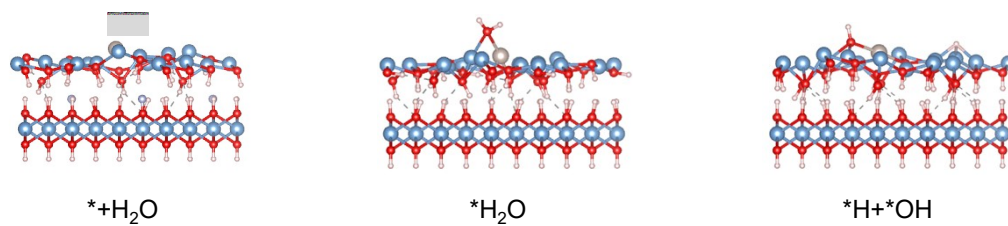

**Fig. S47.** Lattice structure of Ru-Co(OH)<sub>2</sub> for hydrogen evolution reaction.

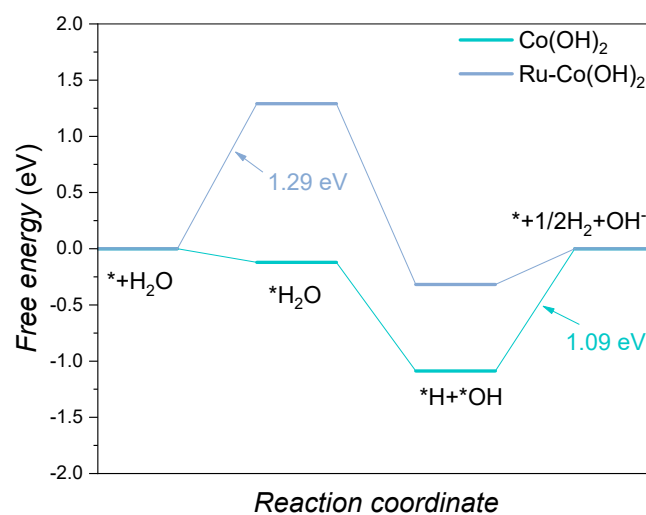

**Fig. S48.** Reaction free-energy diagram of  $\text{Co}(\text{OH})_2$  and  $\text{Ru-Co}(\text{OH})_2$  for hydrogen evolution reaction.

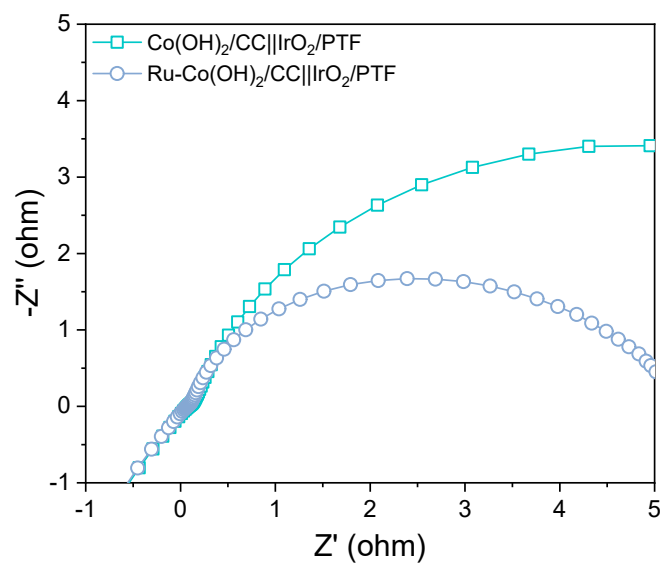

**Fig. S49.** Electrochemical impedance spectroscopy plots of the MEA cell with Ru-Co(OH)<sub>2</sub>/CC and Co(OH)<sub>2</sub>/CC cathodes, paired with an IrO<sub>2</sub>/PTF anode.

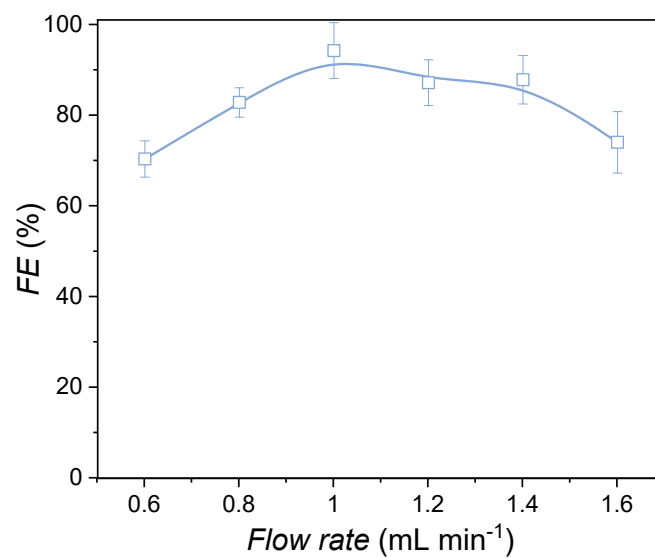

**Fig. S50.** FEs of NH<sub>3</sub> at a current density of 100 mA cm<sup>-2</sup> under different flow rates in the MEA setup.



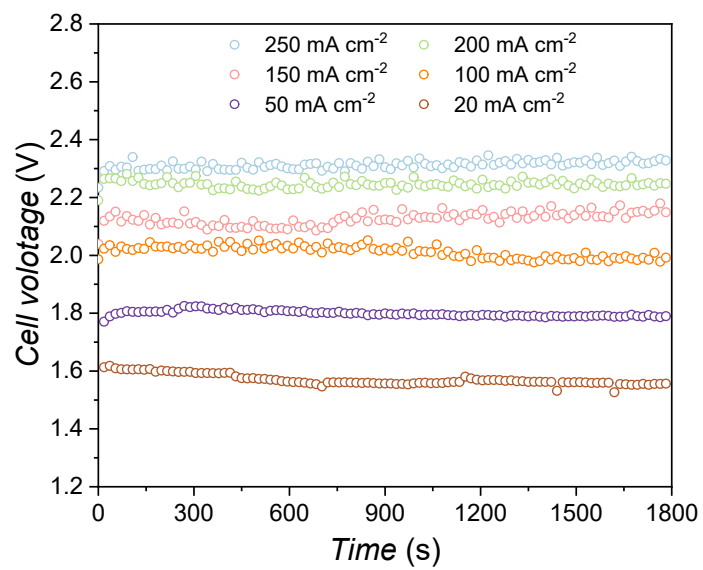

**Fig. S51.** Cell voltage profiles during 30-min constant-current electrolysis for the MEA system at different current densities.

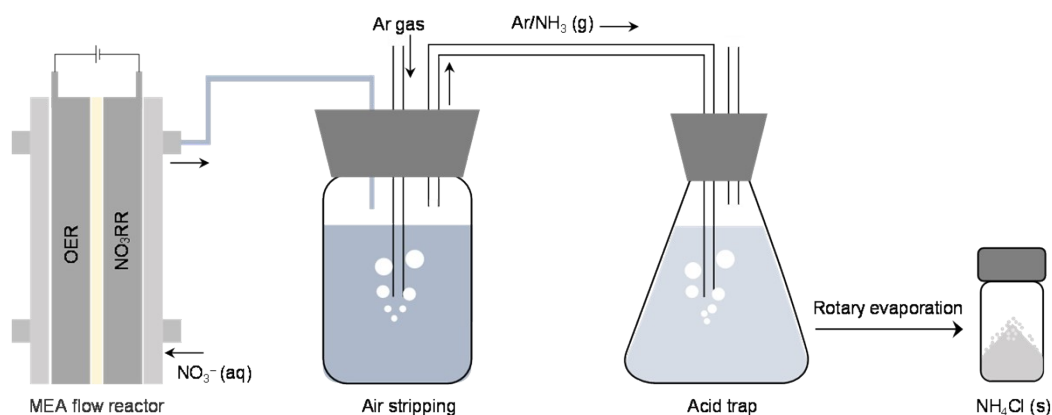

**Fig. S52.** Schematic of the  $\text{NH}_3$  product synthesis process from  $\text{NO}_3^-$ -containing influent to  $\text{NH}_4\text{Cl}(\text{s})$ .

The process for collecting  $\text{NH}_4\text{Cl}$  product is schematically depicted. Following the  $\text{NO}_3\text{RR}$  tests conducted at a current density of  $100 \text{ mA cm}^{-2}$ , 200 mL of cathodic electrolyte was transferred to a conical flask. To recover the dissolved and volatilized ammonia, Ar gas (100 sccm) was bubbled continuously through the electrolyte at  $70^\circ\text{C}$  for 12 h. This stripping step ensured complete release of  $\text{NH}_3$  from the alkaline solution. The outflowing gas stream was directed into an acid trap containing 200 mL of 0.3 M HCl, where the  $\text{NH}_3$  was efficiently captured and converted into  $\text{NH}_4^+$ . This acid-trapping method was crucial for minimizing ammonia loss due to volatilization and ensuring accurate quantification of the reaction product. The collected solution was subsequently concentrated by rotary evaporation at  $70^\circ\text{C}$  for 3 h, followed by overnight drying in an oven to yield the final  $\text{NH}_4\text{Cl}$  powder.

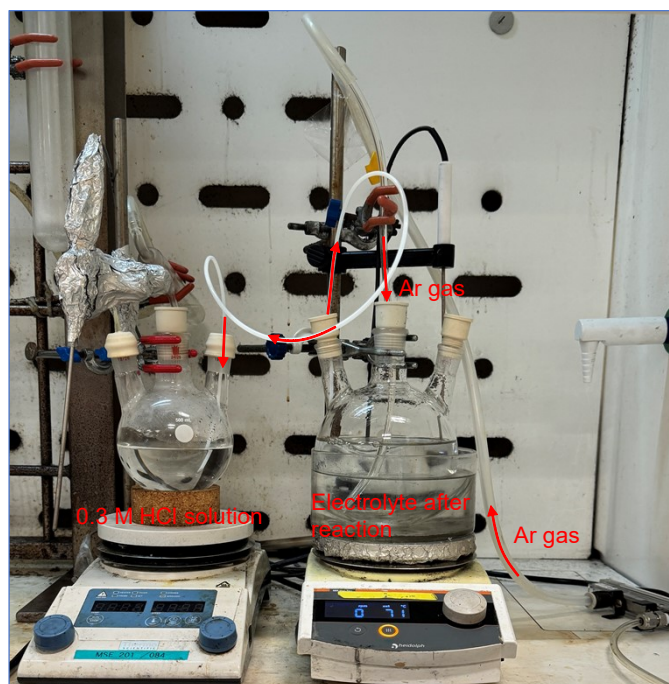

**Fig. S53.** Photo of trapping gas-phase  $\text{NH}_3$  in 0.3 M HCl solution via air stripping.

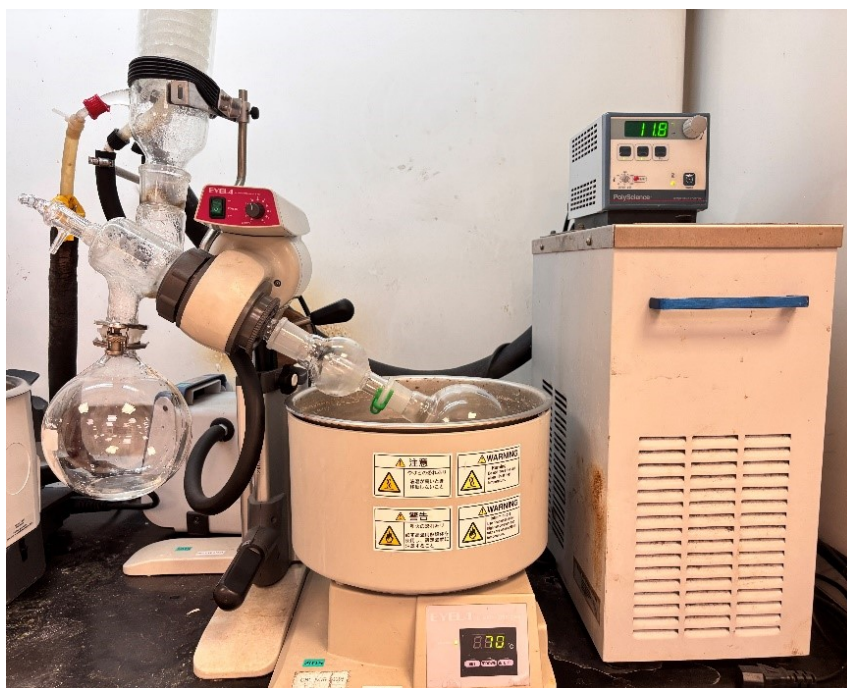

**Fig. S54.** Photo of the removal of water from the product using a rotary evaporator at 70 °C.

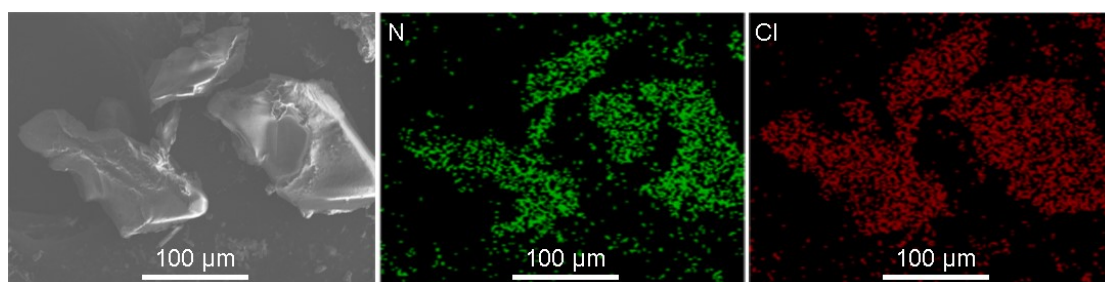

**Fig. S55.** Elemental mapping images confirm the homogeneous distribution of N and Cl elements in the dried precipitate.

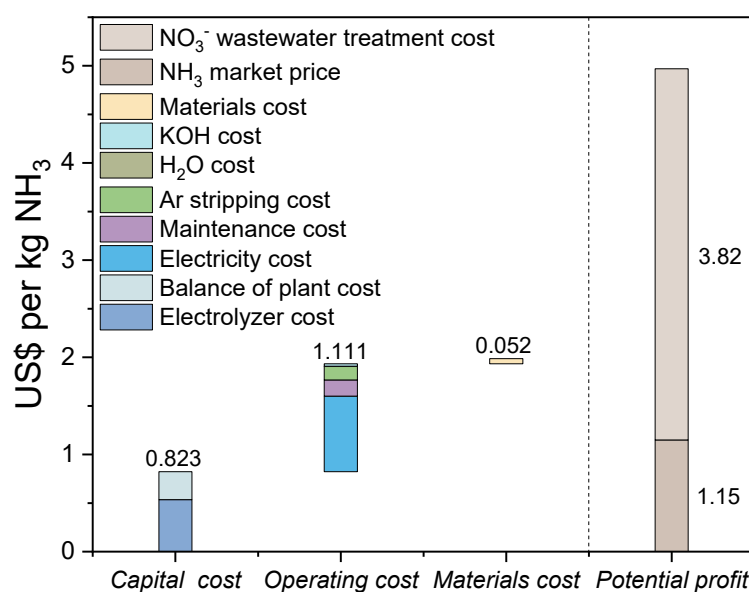

**Fig. S56.** Breakdown of the production cost and potential profitability of NH<sub>3</sub> synthesis via NO<sub>3</sub>RR using a MEA reactor.

The total production cost, encompassing capital, operating, and materials costs, is estimated at US\$1.986 per kg NH<sub>3</sub>. Potential profit considerations include selling NH<sub>3</sub> at the current market price<sup>15</sup> and cost savings from water treatment plants for nitrogen waste processing.<sup>16,17</sup>

Despite a higher production cost compared to NH<sub>3</sub> synthesized via the Haber–Bosch process (US\$1.15 per kg NH<sub>3</sub>), the electrochemical NO<sub>3</sub><sup>-</sup> conversion could become economically competitive when accounting for the offset costs of NO<sub>3</sub><sup>-</sup> wastewater treatment (US\$65 per kmol N, equivalent to US\$3.82 per kg NH<sub>3</sub>). This co-production approach could position the process within a viable economic range for integrated wastewater management and NH<sub>3</sub> synthesis.

**Note S1** Techno-economic assessment of  $\text{NO}_3^-$  conversion using MEA reactor.

TEA in this study was developed and conducted based on previously reported models.<sup>18,19</sup> The baseline parameters for  $\text{NO}_3\text{RR}$  in the MEA reactor were selected based on the performances in this study: a current density of  $100 \text{ mA cm}^{-2}$ , a total cell voltage of 1.95 V, and an  $\text{NH}_3$  FE of 94.2%. Targeted comparison cases include traditional Haber-Bosch plants (reflected by  $\text{NH}_3$  market price<sup>20</sup> and the  $\text{NO}_3^-$  wastewater treatment cost.<sup>16,21</sup>

### Power needed

Assuming an  $\text{NH}_3$  production rate of  $1000 \text{ kg day}^{-1}$ , the total current needed is:

$$\begin{aligned} \text{Total current} &= 1000 \frac{\text{kg}}{\text{day}} \times \frac{\text{day}}{86400 \text{ s}} \times \frac{\text{kmol}}{17.031 \text{ kg}} \times \frac{1000 \text{ mol}}{\text{kmol}} \times 8e^- \times \frac{96485 \text{ C}}{\text{mol}} \times \frac{1}{94.2\%} = 556858 \text{ A} \end{aligned}$$

The total electrolyzer area needed is:

$$\text{Total electrolyzer area} = \frac{556858 \text{ A}}{0.1 \text{ A cm}^{-2}} \times \frac{\text{m}^2}{10^4 \text{ cm}^2} = 556.8 \text{ m}^2 \quad (2)$$

The power needed is calculated by  $P=UI$

$$\text{Total power needed} = 1.95 \text{ V} \times 556858 \text{ A} \times \frac{\text{MW}}{10^6 \text{ W}} = 1.08 \text{ MW} \quad (3)$$

### Resources needed

1. The  $\text{NO}_3^-$  treated per day is:

$$\text{NO}_3^- \text{ needed} = 1000 \frac{\text{kg}(\text{NH}_3)}{\text{day}} \times \frac{1 \text{ kmol}}{17.031 \text{ kg}(\text{NH}_3)} \times \frac{62 \text{ kg}(\text{NO}_3^-)}{1 \text{ kmol}} = 3640.4 \frac{\text{kg}}{\text{day}} \quad (4)$$

2. The water flow rate needed for anodic OER is:

$$\text{H}_2\text{O} = 556859 \text{ A} \times \frac{1}{4e^- \times \frac{96485 \text{ C}}{\text{mol}}} \times \frac{0.018 \text{ kg}}{\text{mol}} \times \frac{0.2642 \text{ gal}}{\text{kg}} \times \frac{86400 \text{ s}}{\text{day}} = 592 \frac{\text{gal}}{\text{day}} \quad (5)$$

### Capital cost

1. Electrolyzer cost

Based on the E4tech/Element Energy report and DOE H2A analysis for central grid electrolysis,<sup>22,23</sup> the electrolyzer cost for the stack component is 550 USD  $\text{kW}^{-1}$  with a reference current density of  $400 \text{ mA cm}^{-2}$  at 1.75 V. An installation factor of 1.12 was used for the capital investment.<sup>23</sup> The total electrolyzer cost is calculated as:

$$\text{Electrolyzer cost} = \frac{550 \$ kW^{-1}}{1000 \frac{W}{kW}} \times \frac{400 mA cm^{-2}}{1000 \frac{mA}{A}} \times 1.75 V \times \frac{556.8 m^2}{0.0001 \frac{m^2}{cm^2}} \times 1.12 = \$2400921 \quad (6)$$

Considering the capital recovery factor (CRF) based on a 5% discount rate (denote as  $i$  in the equation below), with the lifetime of 20 years:

$$CRF = \frac{i(1+i)^{year}}{(1+i)^{year} - 1} = 0.0802 \quad (7)$$

With the operation of 360 days per year and  $NH_3$  production rate of  $1000 kg day^{-1}$ , the electrolyzer cost per kg of  $NH_3$  is:

$$\text{Electrolyzer cost} = \$2400921 \times \frac{0.0802}{360 day} \times \frac{1}{1000 kg day^{-1}} = 0.535 \$ kg(NH_3)^{-1} \quad (8)$$

## 2. Balance of plant (BoP) cost

The BoP cost is assumed to be 35% of the total cost of the electrolyzer system,<sup>18,23</sup> which is:

$$\text{BoP cost} = \frac{0.535 \$ kg(NH_3)^{-1}}{65\%} \times 35\% = 0.288 \$ kg(NH_3)^{-1} \quad (9)$$

## Operating cost

### 1. Electricity cost

The electricity cost is calculated from the power requirement and an electricity price of 3 cent  $kWh^{-1}$  based on the target announced by DOE.<sup>24,25</sup>

$$\begin{aligned} \text{Electricity cost} \\ = 1.08 MW \times \frac{1000 kW}{MW} \times 24 h \times \frac{\$ 0.03}{kWh} \times \frac{1}{1000 kg day^{-1}} = 0.777 \$ kg(NH_3)^{-1} \end{aligned}$$

### 2. Maintenance

It is assumed that maintenance costs are 2.5% of the capital electrolyzer cost per year.<sup>18,23</sup>

$$\text{Maintenance} = \$ 2400921 \times \frac{2.5\%}{year} \times \frac{year}{360 days} \times \frac{1}{1000 kg day^{-1}} = 0.167 \$ kg(NH_3)^{-1} \quad (11)$$

### 3. Water cost

The cost of water to support the anodic OER with the price of  $\$0.0054 gal^{-1}$ :

$$\text{H}_2\text{O cost} = \frac{592 gal}{day} \times \frac{\$0.0054}{gal} \times \frac{1}{1000 kg day^{-1}} = 0.003 \$ (NH_3)^{-1} \quad (12)$$

### 4. KOH cost



In addition, we assume the KOH cost is 5% of the electrolyzer cost:

$$KOH\ cost = 0.535\ \$\ kg(NH_3)^{-1} \times 5\% = 0.026\ \$\ kg(NH_3)^{-1}\ (13)$$

#### 5. Air stripping cost

NH<sub>3</sub> air stripping cost is calculated with the reference of 5.6 kWh kg(N)<sup>-1</sup> and the electricity price of 3 cent per kWh<sup>26</sup>:

$$\begin{aligned} \text{Air stripping cost} &= 1000\ kg\ day^{-1} \times \frac{1\ kmol}{17.031\ kg(NH_3)} \times \frac{14\ kg(N)}{1\ kmol} \times \frac{5.6\ kWh}{kg(N)^{-1}} \times \frac{\$0.03}{kWh} \times \frac{1}{100} \\ &= 0.138\ \$\ kg\ (NH_3)^{-1}\ (14) \end{aligned}$$

#### Materials cost

we assume the materials cost is 10% of the electrolyzer cost<sup>18,23</sup>:

$$Materials\ cost = 0.535\ \$\ kg(NH_3)^{-1} \times 10\% = 0.052\ \$\ kg(NH_3)^{-1}\ (15)$$

#### 6. Electrodialysis cost for concentrating NO<sub>3</sub><sup>-</sup> sources

In the scenario where NO<sub>3</sub><sup>-</sup> is required to be concentrated by electrodialysis in advance before feeding into MEA system, the cost of electrodialysis process is calculated with the reference of US\$5.75 (kmol(NO<sub>3</sub><sup>-</sup>)<sup>-1</sup>) total process cost that concentrated the NO<sub>3</sub><sup>-</sup> from 7.14 mM to 2 M of wastewater sources<sup>13</sup>. The electrodialysis cost to supply the NO<sub>3</sub><sup>-</sup> need of 3640.4 kg day<sup>-1</sup> for MEA system is calculated as:

$$\begin{aligned} \text{Electrodialysis process cost for } NO_3^- &= 3640.4\ \frac{kg}{day} \times \frac{\$5.75}{kmol} \times \frac{1\ kmol}{62\ kg} \times \frac{1}{1000\ kg\ day^{-1}} = 0.338\ \$\ kg\ (NH_3)^{-1}\ (16) \end{aligned}$$

Note that based on the same electrodialysis model<sup>16</sup>, if we aim to concentrate the nitrate sources such as municipal wastewater or polluted groundwater<sup>27</sup> from 50 ppm NO<sub>3</sub><sup>-</sup> (equivalent to 0.81 mM NO<sub>3</sub><sup>-</sup>) to 0.0323 mM (concentration in this work), a total electrodialysis cost would be US\$36.95 (kmol(NO<sub>3</sub><sup>-</sup>)<sup>-1</sup>), including US\$6.61 (kmol(NO<sub>3</sub><sup>-</sup>)<sup>-1</sup>) of OPEX and US\$30.34 (kmol(NO<sub>3</sub><sup>-</sup>)<sup>-1</sup>) of levelized capital cost, which is ~6.4 times higher than the electrodialysis cost above.

**Table S1.** Comparison of NO<sub>3</sub>RR performances of Ru-Co(OH)<sub>2</sub>/CC with recently reported electrocatalysts.

| Electrocatalyst                                 | Electrolyte                                      | NH <sub>3</sub> FE | EE     | NH <sub>3</sub> yield rate                               | NH <sub>3</sub> partial current | Ref.      |
|-------------------------------------------------|--------------------------------------------------|--------------------|--------|----------------------------------------------------------|---------------------------------|-----------|
| Ru-Co(OH) <sub>2</sub> /CC                      | 0.032 M NO <sub>3</sub> <sup>-</sup> + 1 M KOH   | ~96%               | 30.4%  | ~56501 µg h <sup>-1</sup> cm <sup>-2</sup>               | 602.8 mA cm <sup>-2</sup>       | This work |
|                                                 | 0.1 M NO <sub>3</sub> <sup>-</sup> + 1 M KOH     | 97.2%              | 30.2%  | 84413.5 µg h <sup>-1</sup> cm <sup>-2</sup>              | 901.2 mA cm <sup>-2</sup>       |           |
| CuCo NW                                         | 0.032 M NO <sub>3</sub> <sup>-</sup> + 0.1 M KOH | 92.7%              | 14.67% | 7310 µg h <sup>-1</sup> cm <sup>-2</sup>                 | 444.9 mA cm <sup>-2</sup>       | 28        |
| Cu <sub>1</sub> Ru <sub>100</sub>               | 0.01 M NO <sub>3</sub> <sup>-</sup> + 0.1 M KOH  | 48%                | 21.79% | 2380 µg h <sup>-1</sup> cm <sup>-2</sup>                 | 102 mA cm <sup>-2</sup>         | 29        |
| Cu/β-Co(OH) <sub>2</sub>                        | 0.1 M NO <sub>3</sub> <sup>-</sup> + 0.1 M KOH   | 97.7%              | /      | 66300 µg h <sup>-1</sup> cm <sup>-2</sup>                | 882 mA cm <sup>-2</sup>         | 30        |
| P-Cu/Co(OH) <sub>2</sub>                        | 0.1 M NO <sub>3</sub> <sup>-</sup> + 1 M KOH     | 97.04%             | /      | 42630 µg h <sup>-1</sup> cm <sup>-1</sup>                | 1315 mA cm <sup>-2</sup>        | 31        |
| Ru-Cu nanowire                                  | 0.032 M NO <sub>3</sub> <sup>-</sup> + 1 M KOH   | 96.0%              | /      | 76500 µg h <sup>-1</sup> cm <sup>-2</sup>                | 965 mA cm <sup>-2</sup>         | 32        |
| CuCo/CN                                         | 0.032 M NO <sub>3</sub> <sup>-</sup> + 1 M KOH   | 93.56 %            | /      | 3967.8 µg h <sup>-1</sup> cm <sup>-2</sup>               | 185 mA cm <sup>-2</sup>         | 33        |
| NG-RuCo                                         | 0.032 M NO <sub>3</sub> <sup>-</sup> + 1 M KOH   | 93%                | /      | 81600 µg h <sup>-1</sup> cm <sup>-2</sup>                | 810 mA cm <sup>-2</sup>         | 34        |
| CuCoSP                                          | 0.01 M NO <sub>3</sub> <sup>-</sup> + 0.1 M KOH  | 93.3% ± 2.1%       | /      | 19890 µg h <sup>-1</sup> cm <sup>-2</sup>                | 38 mA cm <sup>-2</sup>          | 35        |
| Cu <sub>3</sub> P@Co(OH) <sub>2</sub> /CF       | 0.01 M NO <sub>3</sub> <sup>-</sup> + 1 M KOH    | 86.7%              | /      | 3230 µg h <sup>-1</sup> cm <sup>-2</sup>                 | 32.4 mA cm <sup>-2</sup>        | 36        |
| CoCuO <sub>x</sub> @CuO <sub>x</sub> /CF        | 0.02 M NO <sub>3</sub> <sup>-</sup> + 0.1 M KOH  | 91%                | /      | 32500 µg h <sup>-1</sup> cm <sup>-2</sup>                | 13.6 mA cm <sup>-2</sup>        | 37        |
| MP-Cu                                           | 0.05 M NO <sub>3</sub> <sup>-</sup> + 1 M KOH    | 99.8%              | /      | 9231 µg h <sup>-1</sup> cm <sup>-2</sup>                 | 135 mA cm <sup>-2</sup>         | 38        |
| CoO <sub>x</sub> nanosheets                     | 0.1 M NO <sub>3</sub> <sup>-</sup> + 0.1 M KOH   | 93.4% ± 3.8%       | /      | 82400 µg h <sup>-1</sup> mg <sub>cat</sub> <sup>-1</sup> | 2.6 mA cm <sup>-2</sup>         | 39        |
| Fe/Cu diatomic catalyst/nitrogen-doped graphene | 0.1 M NO <sub>3</sub> <sup>-</sup> + 1 M KOH     | 92.51%             | /      | 2310 µg h <sup>-1</sup> cm <sup>-2</sup>                 | 37 mA cm <sup>-2</sup>          | 40        |
| Cu-N-C single atom catalyst                     | 0.1 M NO <sub>3</sub> <sup>-</sup> + 0.1 M KOH   | 84.7%              | /      | 4500 µg h <sup>-1</sup> cm <sup>-2</sup>                 | 40.6 mA cm <sup>-2</sup>        | 41        |
| Ru <sub>x</sub> Cu <sub>y</sub> /rGO            | 0.1 M NO <sub>3</sub> <sup>-</sup> + 1 M KOH     | 98%                | /      | 6460 µg h <sup>-1</sup> cm <sup>-2</sup>                 | 42 mA cm <sup>-2</sup>          | 42        |

|         |                                   |       |   |                                           |                         |    |
|---------|-----------------------------------|-------|---|-------------------------------------------|-------------------------|----|
| CoP-CNS | 1 M $\text{NO}_3^-$ +<br>1 M NaOH | 93.3% | / | 52530 $\mu\text{g h}^{-1} \text{cm}^{-2}$ | 111 mA $\text{cm}^{-2}$ | 43 |
|---------|-----------------------------------|-------|---|-------------------------------------------|-------------------------|----|

**Table S2.** The intensity of the peak at 1060 cm<sup>-1</sup> and 1554 cm<sup>-1</sup> of Co(OH)<sub>2</sub> and Ru-Co(OH)<sub>2</sub> at different applied potentials in Ar-saturated 1 M KOH solution with 2,000 ppm NO<sub>3</sub><sup>-</sup>.

| Applied potentials           | Intensity at 1060 cm <sup>-1</sup> | Intensity at 1554 cm <sup>-1</sup> | I <sub>1060</sub> /I <sub>1554</sub> |
|------------------------------|------------------------------------|------------------------------------|--------------------------------------|
| <b>Ru-Co(OH)<sub>2</sub></b> |                                    |                                    |                                      |
| 0.0 V                        | 38.94                              | 49.22                              | 0.79                                 |
| -0.1 V                       | 32.42                              | 48.83                              | 0.66                                 |
| -0.2 V                       | 33.36                              | 54.29                              | 0.61                                 |
| -0.3 V                       | 37.76                              | 49.64                              | 0.76                                 |
| -0.4 V                       | 27.32                              | 45.82                              | 0.59                                 |
| -0.5 V                       | 30.33                              | 46.96                              | 0.64                                 |
| -0.6 V                       | 43.73                              | 53.14                              | 0.82                                 |
| -0.7 V                       | 31.37                              | 46.45                              | 0.67                                 |
| -0.8 V                       | 30.70                              | 55.97                              | 0.54                                 |
| -0.9 V                       | 43.68                              | 45.91                              | 0.95                                 |
| <b>Ru-Co(OH)<sub>2</sub></b> |                                    |                                    |                                      |
| 0.0 V                        | 38.18                              | 58.57                              | 0.65                                 |
| -0.1 V                       | 36.27                              | 45.20                              | 0.80                                 |
| -0.2 V                       | 40.64                              | 51.33                              | 0.79                                 |
| -0.3 V                       | 31.18                              | 40.98                              | 0.76                                 |
| -0.4 V                       | 42.27                              | 48.01                              | 0.88                                 |
| -0.5 V                       | 33.33                              | 51.51                              | 0.64                                 |
| -0.6 V                       | 44.95                              | 50.18                              | 0.89                                 |
| -0.7 V                       | 35.98                              | 45.70                              | 0.78                                 |
| -0.8 V                       | 39.92                              | 49.05                              | 0.81                                 |
| -0.9 V                       | 45.76                              | 40.92                              | 1.11                                 |

**Table S3.** The Bader charges of Ru-Co(OH)<sub>2</sub> derived from the DFT calculations.

| Atoms | Formal electron loss |
|-------|----------------------|
| Co-1  | -0.89                |
| Co-2  | -0.86                |
| Co-3  | -0.48                |
| Co-4  | -0.11                |
| Co-5  | -0.79                |
| Co-6  | -0.78                |
| Ru    | 0.19                 |

**Table S4.** The calculated free energy of all intermediates over  $\text{Co(OH)}_2$  and Ru- $\text{Co(OH)}_2$ .

| Models                      | Status                                                                    | $\Delta G(\text{eV})$ | Free energy (eV) |
|-----------------------------|---------------------------------------------------------------------------|-----------------------|------------------|
| $\text{Co(OH)}_2$ (001)     | $\text{Co(OH)}_2$ (001) + $\text{NO}_3^-$                                 | 0                     | 0                |
| * $\text{NO}_3$             | * + $\text{NO}_3^- \rightarrow$ * $\text{NO}_3$                           | -2.45874              | -2.45874         |
| * $\text{NO}_2$             | * $\text{NO}_3$ + 2H $\rightarrow$ * $\text{NO}_2$ + $\text{H}_2\text{O}$ | -2.04234              | -4.50108         |
| * $\text{NO}$               | * $\text{NO}_2$ + 2H $\rightarrow$ * $\text{NO}$ + $\text{H}_2\text{O}$   | 0.785941              | -3.71514         |
| * $\text{NOH}$              | * $\text{NO}$ + H $\rightarrow$ * $\text{NOH}$                            | -1.41307              | -5.12821         |
| * $\text{N}$                | * $\text{NOH}$ + H $\rightarrow$ * $\text{N}$ + $\text{H}_2\text{O}$      | -0.56992              | -5.69813         |
| * $\text{NH}$               | * $\text{N}$ + H $\rightarrow$ * $\text{NH}$                              | -2.05133              | -7.74945         |
| * $\text{NH}_2$             | * $\text{NH}$ + H $\rightarrow$ * $\text{NH}_2$                           | -0.89961              | -8.64907         |
| * $\text{NH}_3$             | * $\text{NH}_2$ + H $\rightarrow$ * $\text{NH}_3$                         | 0.485609              | -8.16346         |
|                             | * $\text{NH}_3 \rightarrow$ * + $\text{NH}_3$                             | 0.36355               | -7.79991         |
| Ru- $\text{Co(OH)}_2$ (001) | Ru- $\text{Co(OH)}_2$ (001) + $\text{NO}_3^-$                             | 0                     | 0                |
| * $\text{NO}_3$             | * + $\text{NO}_3^- \rightarrow$ * $\text{NO}_3$                           | -2.95435              | -2.95435         |
| * $\text{NO}_2$             | * $\text{NO}_3$ + 2H $\rightarrow$ * $\text{NO}_2$ + $\text{H}_2\text{O}$ | -2.11622              | -5.07057         |
| * $\text{NO}$               | * $\text{NO}_2$ + 2H $\rightarrow$ * $\text{NO}$ + $\text{H}_2\text{O}$   | -1.28646              | -6.35702         |
| * $\text{NOH}$              | * $\text{NO}$ + H $\rightarrow$ * $\text{NOH}$                            | -0.13116              | -6.48818         |
| * $\text{N}$                | * $\text{NOH}$ + H $\rightarrow$ * $\text{N}$ + $\text{H}_2\text{O}$      | 0.63829               | -5.84989         |
| * $\text{NH}$               | * $\text{N}$ + H $\rightarrow$ * $\text{NH}$                              | -0.42026              | -6.27016         |
| * $\text{NH}_2$             | * $\text{NH}$ + H $\rightarrow$ * $\text{NH}_2$                           | -1.7307               | -8.00086         |
| * $\text{NH}_3$             | * $\text{NH}_2$ + H $\rightarrow$ * $\text{NH}_3$                         | 0.409411              | -7.59145         |
|                             | * $\text{NH}_3 \rightarrow$ * + $\text{NH}_3$                             | -0.20846              | -7.79991         |

## References

- [1] X. Deng, Y. Yang, L. Wang, X.-Z. Fu and J.-L. Luo, *Adv. Sci.*, 2021, **8**, 2004523.
- [2] Y. Huang, C. He, C. Cheng, S. Han, M. He, Y. Wang, N. Meng, B. Zhang, Q. Lu and Y. Yu, *Nat. Commun.*, 2023, **14**, 7368.
- [3] G. Henkelman, A. Arnaldsson and H. Jónsson, *Comput. Mater. Sci.*, 2006, **36**, 354-360.
- [4] S. Kalasina, P. Pattanasattayavong, M. Suksomboon, N. Phattharasupakun, J. Wutthiprom and M. Sawangphruk, *Chem. Commun.*, 2017, **53**, 709-712.
- [5] Z. Liu, R. Ma, M. Osada, K. Takada and T. Sasaki, *J. Am. Chem. Soc.*, 2005, **127**, 13869-13874.
- [6] T. Deng, W. Zhang, O. Arcelus, J.-G. Kim, J. Carrasco, S. J. Yoo, W. Zheng, J. Wang, H. Tian, H. Zhang, X. Cui and T. Rojo, *Nat. Commun.*, 2017, **8**, 15194.
- [7] Q. Zhou, Q. Bian, L. Liao, F. Yu, D. Li, D. Tang and H. Zhou, *Chin. Chem. Lett.*, 2023, **34**, 107248.
- [8] K. Kongsawatvoragul, S. Kalasina, P. Kidkhunthod and M. Sawangphruk, *Electrochim. Acta*, 2019, **324**, 134854.
- [9] C. C. L. McCrory, S. Jung, J. C. Peters and T. F. Jaramillo, *J. Am. Chem. Soc.*, 2013, **135**, 16977-16987.
- [10] D. Zhu, L. Zhang, R. E. Ruther and R. J. Hamers, *Nat. Mater.*, 2013, **12**, 836-841.
- [11] L. C. Green, D. A. Wagner, J. Glogowski, P. L. Skipper, J. S. Wishnok and S. R. Tannenbaum, *Anal. Biochem.*, 1982, **126**, 131-138.
- [12] Y. Wang, Y. Yu, R. Jia, C. Zhang and B. Zhang, *Natl. Sci. Rev.*, 2019, **6**, 730-738.
- [13] Y. Yao, S. Chen, C. Yan, J. Wang, J. Liu, W.-H. Zhu, C. Fan and Z. Guo, *Angew. Chem. Int. Ed.*, 2025, **64**, e202416963.
- [14] C. Xie, W. Chen, S. Du, D. Yan, Y. Zhang, J. Chen, B. Liu and S. Wang, *Nano Energy*, 2020, **71**, 104653.

- [15] Schnitkey, G. et al. Fertilizer prices and company profits going into spring 2023. Farmdoc Daily <https://farmdocdaily.illinois.edu/2023/02/fertilizer-prices-and-company-profits-going-into-spring-2023.html> (2023).
- [16] Y. Chen, P. Ammari-Azar, H. Liu, J. Lee, Y. Xi, M. J. Castellano, S. Gu and W. Li, *EES Catal.*, 2023, **1**, 504-515.
- [17] US EPA. A compilation of cost data associated with the impacts and control of nutrient pollution. <https://www.epa.gov/sites/default/files/2015-04/documents/nutrient-economics-report-2015.pdf> (2015).
- [18] M. Jouny, W. Luc and F. Jiao, *Ind. Eng. Chem. Res.*, 2018, **57**, 2165-2177.
- [19] H. Shin, K. U. Hansen and F. Jiao, *Nat. Sustain.*, 2021, **4**, 911-919.
- [20] Schnitkey, G. et al. Fertilizer prices and company profits going into spring 2023. farmdoc daily 13, (2023)
- [21] USEPA. A compilation of cost data associated with the impacts and control of nutrient pollution. 110 (2015)
- [22] Bertuccioli, L. et al. Study on development of water electrolysis in the EU. [https://www.fch.europa.eu/sites/default/files/FCHJUElectrolysisStudy\\_FullReport%20\(ID%20199214\).pdf](https://www.fch.europa.eu/sites/default/files/FCHJUElectrolysisStudy_FullReport%20(ID%20199214).pdf). (2014).
- [23] James, B., Colella, W., Moton, J. PEM Electrolysis H<sub>2</sub>A Production Case Study Documentation. <https://www.nrel.gov/hydrogen/assets/pdfs/h2a-pem-electrolysis-case-study-documentation.pdf> (2013).
- [24] Association, U. E. I. Levelized costs of new generation resources in the annual energy outlook 2013. US Department of Energy, January, (2013)
- [25] N. M. Haegel, R. Margolis, T. Buonassisi, D. Feldman, A. Froitzheim, R. Garabedian, M. Green, S. Glunz, H.-M. Henning, B. Holder, I. Kaizuka, B. Kroposki, K. Matsubara, S. Niki, K. Sakurai, R. A. Schindler, W. Tumas, E. R. Weber, G. Wilson, M. Woodhouse and S. Kurtz, *Science*, 2017, **356**, 141-143.



- [26] C. Shin, A. Szczuka, M. J. Liu, L. Mendoza, R. Jiang, S. H. Tilmans, W. A. Tarpeh, W. A. Mitch and C. S. Criddle, *Environ. Sci. Technol.*, 2022, **56**, 8712-8721.
- [27] P. H. van Langevelde, I. Katsounaros and M. T. M. Koper, *Joule*, 2021, **5**, 290-294.
- [28] K. Zhang, P. Sun, Y. Huang, M. Tang, X. Zou, Z. Pan, X. Huo, J. Wu, C. Lin, Z. Sun, Y. Wan, X. Zhang and L. An, *Adv. Funct. Mater.*, 2024, **34**, 2405179.
- [29] R. Boppella, M. Ahmadi, B. M. Arndt, D. R. Lustig and M. Nazemi, *ACS Catal.*, 2024, **14**, 18223-18236.
- [30] L. Qiao, A. Zhu, D. Liu, K. An, J. Feng, C. Liu, K. W. Ng and H. Pan, *Adv. Energy Mater.*, 2024, **14**, 2402805.
- [31] Q. Yan, R. Zhao, L. Yu, Z. Zhao, L. Liu and J. Xi, *Adv. Mater.*, 2024, **36**, 2408680.
- [32] F.-Y. Chen, Z.-Y. Wu, S. Gupta, D. J. Rivera, S. V. Lambeets, S. Pecaut, J. Y. T. Kim, P. Zhu, Y. Z. Finfrock, D. M. Meira, G. King, G. Gao, W. Xu, D. A. Cullen, H. Zhou, Y. Han, D. E. Perea, C. L. Muhich and H. Wang, *Nat. Nanotechnol.*, 2022, **17**, 759-767.
- [33] Y. Sheng, R. Yang, K. Shi, H. Yu, K. Deng, Z. Wang, H. Wang, L. Wang and Y. Xu, *Chem. Eng. J.*, 2024, **485**, 149769.
- [34] X. Chen, Y. Cheng, B. Zhang, J. Zhou and S. He, *Nat. Commun.*, 2024, **15**, 6278.
- [35] W. He, J. Zhang, S. Dieckhöfer, S. Varhade, A. C. Brix, A. Lielpetere, S. Seisel, J. R. C. Junqueira and W. Schuhmann, *Nat. Commun.*, 2022, **13**, 1129.
- [36] J. Yue, S. Liping, W. Yuechen, H. Lihua and Z. Hui, *Int. J. Hydrogen Energy*, 2024, **71**, 820-830.
- [37] C. Xiao, Y. Guo, J. Sun, T. Guo, X. Jia, S. Guo, G. Wu, Y. Sun, Z. Yao and Y. Liu, *Nano Res.*, 2024, **17**, 5087-5094.
- [38] W. Wen, P. Yan, W. Sun, Y. Zhou and X.-Y. Yu, *Adv. Funct. Mater.*, 2023, **33**, 2212236.

- [39] J. Wang, C. Cai, Y. Wang, X. Yang, D. Wu, Y. Zhu, M. Li, M. Gu and M. Shao, *ACS Catal.*, 2021, **11**, 15135-15140.
- [40] S. Zhang, J. Wu, M. Zheng, X. Jin, Z. Shen, Z. Li, Y. Wang, Q. Wang, X. Wang, H. Wei, J. Zhang, P. Wang, S. Zhang, L. Yu, L. Dong, Q. Zhu, H. Zhang and J. Lu, *Nat. Commun.*, 2023, **14**, 3634.
- [41] J. Yang, H. Qi, A. Li, X. Liu, X. Yang, S. Zhang, Q. Zhao, Q. Jiang, Y. Su, L. Zhang, J.-F. Li, Z.-Q. Tian, W. Liu, A. Wang and T. Zhang, *J. Am. Chem. Soc.*, 2022, **144**, 12062-12071.
- [42] W. Gao, K. Xie, J. Xie, X. Wang, H. Zhang, S. Chen, H. Wang, Z. Li and C. Li, *Adv. Mater.*, 2023, **35**, 2202952.
- [43] K. Fan, W. Xie, J. Li, Y. Sun, P. Xu, Y. Tang, Z. Li and M. Shao, *Nat. Commun.*, 2022, **13**, 7958.
